# Supplementary material
Source: PubMed Central journal article supplement (PMC3391332)
Supplement: NIHMS380784-supplement-ESM_2.pdf [file NIHMS380784-supplement-ESM_2.pdf]

## 2. SciMiner Tables

### 2.1 SciMiner query list

This table contains the different SciMiner queries tried. Queries took a very long time to run, so only the most promising were run.

| PubMed Query                                         | # DEGs in top 25 |      | # DEGs expressed in same direction |      |
|------------------------------------------------------|------------------|------|------------------------------------|------|
|                                                      | 8wk              | 24wk | 8wk                                | 24wk |
| “endoplasmic reticulum stress” OR “ER stress”        | 0                | 4    | 0                                  | 4    |
| Chaperone[mesh]                                      | 0                | 4    | 0                                  | 4    |
| Cholesterol/biosynthesis[Majr]                       | 0                | 4    | 0                                  | 3    |
| Autophagy[mesh]                                      | 1                | 4    | 1                                  | 2    |
| Lysosome[mesh] AND Review[ptyp]                      | 0                | 3    | 0                                  | 2    |
| Mitosis[mesh] AND Review[ptyp]                       | 1                | 2    | 1                                  | 2    |
| Protein Folding[mesh] AND Review[ptyp]               | 0                | 2    | 0                                  | 2    |
| Synapse[mesh] AND Review[ptyp]                       | 0                | 2    | 0                                  | 1    |
| Apoptosis[mesh] AND Review[ptyp]                     | 1                | 1    | 1                                  | 1    |
| Proteasome[mesh]                                     | 1                | 1    | 1                                  | 1    |
| Ubiquitination[mesh]                                 | 1                | 1    | 1                                  | 1    |
| Alzheimer’s Disease[mesh] AND Review[ptyp]           | 0                | 1    | 0                                  | 1    |
| Amyotrophic Lateral Sclerosis[mesh]                  | 0                | 1    | 0                                  | 1    |
| Diabetic Neuropathy[mesh]                            | 0                | 1    | 0                                  | 1    |
| Histone[mesh] AND Review[ptyp]                       | 0                | 1    | 0                                  | 1    |
| Genetic Epigenesis[mesh] AND Review[ptyp]            | 0                | 1    | 0                                  | 1    |
| Myelin Sheath[mesh]                                  | 0                | 1    | 0                                  | 1    |
| Oxidative Stress[mesh] AND Review[ptyp]              | 0                | 1    | 0                                  | 1    |
| Lipid Metabolism[mesh] AND Review[ptyp]              | 0                | 1    | 0                                  | 1    |
| Cell junction[mesh] AND Brain[mesh] AND Review[ptyp] | 0                | 1    | 0                                  | 1    |
| DNA repair[mesh] AND Review[ptyp]                    | 1                | 0    | 1                                  | 0    |
| Ribosome[mesh] AND Review [ptyp]                     | 1                | 0    | 1                                  | 0    |
| Vascular Dementia[mesh]                              | 0                | 0    | 0                                  | 0    |
| Inflammation[mesh] AND Review[ptyp]                  | 0                | 0    | 0                                  | 0    |
| Mitochondria[mesh] AND Review[ptyp]                  | 0                | 0    | 0                                  | 0    |
| Carbohydrate Metabolism[mesh] AND Review[ptyp]       | 0                | 0    | 0                                  | 0    |
| Calcium[mesh] AND Review[ptyp]                       | 0                | 0    | 0                                  | 0    |

| PubMed Query                             | # DEGs in top 25 | # DEGs expressed in same direction |
|------------------------------------------|------------------|------------------------------------|
| Protein transport[mesh] AND Review[ptyp] | 0                | 0                                  |

### 2.2. SciMiner top 25 for: “ER Stress” OR “Endoplasmic Reticulum Stress”

This table contains the genes in the top 25 most frequent genes when searching PubMed for “ER Stress” OR “Endoplasmic Reticulum Stress” that were also differentially regulated at 24 weeks (none were differentially regulated at 8 weeks).

| Mouse<br>Entrez ID | Symbol  | Name                                                    | Fold Change | Manuscripts with<br>Gene | SciMiner<br>Rank |
|--------------------|---------|---------------------------------------------------------|-------------|--------------------------|------------------|
| 14828              | Hspa5   | heat shock protein 5<br>DNA-damage inducible transcript | 0.84        | 1407                     | 1                |
| 13198              | Ddit3   | 3                                                       | 0.8         | 853                      | 2                |
| 22433              | Xbp1    | X-box binding protein 1                                 | 0.8         | 510                      | 8                |
| 22027              | Hsp90b1 | heat shock protein 90, beta<br>(Grp94), member 1        | 0.84        | 419                      | 17               |

### 2.3. SciMiner top 25 for: Chaperone [MeSH]

This table contains the genes in the top 25 most frequent genes when searching PubMed for Chaperone [MeSH] that were also differentially regulated (none were differentially regulated at 8 weeks).

| Mouse<br>Entrez ID | Symbol  | Name                                                | Fold Change | Manuscripts with Gene | SciMiner<br>Rank |
|--------------------|---------|-----------------------------------------------------|-------------|-----------------------|------------------|
| 14828              | Hspa5   | heat shock protein 5                                | 0.84        | 2264                  | 7                |
| 15528              | Hspe1   | heat shock protein 1<br>(chaperonin 10)             | 0.88        | 1697                  | 9                |
| 22027              | Hsp90b1 | heat shock protein 90,<br>beta (Grp94), member<br>1 | 0.84        | 1211                  | 16               |

|       |      |                     |      |      |    |
|-------|------|---------------------|------|------|----|
| 15499 | Hsf1 | heat shock factor 1 | 0.85 | 1084 | 24 |
|-------|------|---------------------|------|------|----|

---
