# Supplementary material
Source: PubMed Central journal article supplement (PMC3391332)
Supplement: NIHMS380784-supplement-ESM_4.pdf [file NIHMS380784-supplement-ESM_4.pdf]

#### 4. Complete differentially expressed genes (DEG) list

##### 4.1. 8-week DEGs

This is the complete list of 822 DEGs between diabetic (db/db) and control (db/+) mouse hippocampus at 8 weeks of age.

| Mouse<br>Entrez ID | Human<br>Entrez ID | Symbol  | Name                                                                | Fold<br>Change | FDR      |
|--------------------|--------------------|---------|---------------------------------------------------------------------|----------------|----------|
| 11486              | 100                | Ada     | adenosine deaminase                                                 | 2.31           | 9.94E-02 |
| 11492              | 8728               | Adam19  | a disintegrin and metallopeptidase domain 19 (meltrin beta)         | 0.71           | 3.41E-02 |
| 11666              | 215                | Abcd1   | ATP-binding cassette, sub-family D (ALD), member 1                  | 0.73           | 6.28E-02 |
| 11770              | 2167               | Fabp4   | fatty acid binding protein 4, adipocyte                             | 0.19           | 4.16E-02 |
| 12040              | 594                | Bckdhb  | branched chain ketoacid dehydrogenase E1, beta polypeptide          | 0.86           | 4.43E-02 |
| 12140              | 2173               | Fabp7   | fatty acid binding protein 7, brain                                 | 0.73           | 6.68E-02 |
| 12575              | 1026               | Cdkn1a  | cyclin-dependent kinase inhibitor 1A (P21)                          | 3.46           | 1.43E-02 |
| 12615              | 1058               | Cenpa   | centromere protein A                                                | 1.72           | 9.44E-02 |
| 12626              | 1070               | Cetn3   | centrin 3                                                           | 1.15           | 4.44E-02 |
| 12696              | 1153               | Cirbp   | cold inducible RNA binding protein                                  | 1.44           | 2.26E-02 |
| 12733              | 1187               | Clcnka  | chloride channel Ka                                                 | 1.69           | 4.45E-02 |
| 12798              | 1265               | Cnn2    | calponin 2                                                          | 1.39           | 7.21E-02 |
| 13516              | 1833               | Epyc    | epiphycan                                                           | 0.64           | 7.21E-02 |
| 13537              | 1844               | Dusp2   | dual specificity phosphatase 2                                      | 1.33           | 9.30E-02 |
| 13885              | 2098               | Esd     | esterase D/formylglutathione hydrolase                              | 0.79           | 9.30E-02 |
| 14155              | 10116              | Fem1b   | feminization 1 homolog b (C. elegans)                               | 1.59           | 3.86E-02 |
| 14229              | 2289               | Fkbp5   | FK506 binding protein 5                                             | 1.49           | 2.59E-02 |
| 14231              | 51661              | Fkbp7   | FK506 binding protein 7                                             | 1.24           | 8.16E-02 |
| 14296              | 10023              | Frat1   | frequently rearranged in advanced T-cell lymphomas                  | 1.5            | 4.64E-02 |
| 14409              | 2570               | Gabbr2  | gamma-aminobutyric acid (GABA) C receptor, subunit rho 2            | 2.12           | 4.44E-02 |
| 14958              | 3005               | H1f0    | H1 histone family, member 0                                         | 1.12           | 6.32E-02 |
| 14961              | 3119               | H2-Ab1  | histocompatibility 2, class II antigen A, beta 1                    | 1.4            | 8.19E-02 |
| 15483              | 3290               | Hsd11b1 | hydroxysteroid 11-beta dehydrogenase 1                              | 1.14           | 8.64E-02 |
| 16493              | 3741               | Kcna5   | potassium voltage-gated channel, shaker-related subfamily, member 5 | 1.54           | 4.18E-02 |
| 16526              | 3776               | Kcnk2   | potassium channel, subfamily K, member 2                            | 1.11           | 9.30E-02 |
| 16538              | 3787               | Kcns1   | K <sup>+</sup> voltage-gated channel, subfamily S, 1                | 1.34           | 7.27E-02 |
| 16560              | 547                | Kif1a   | kinesin family member 1A                                            | 1.39           | 4.64E-02 |

| Mouse<br>Entrez ID | Human<br>Entrez ID | Symbol  | Name                                                                                   | Fold<br>Change | FDR      |
|--------------------|--------------------|---------|----------------------------------------------------------------------------------------|----------------|----------|
| 16581              | 90990              | Kifc2   | kinesin family member C2                                                               | 1.13           | 8.12E-02 |
| 16601              | 687                | Klf9    | Kruppel-like factor 9                                                                  | 1.25           | 4.09E-02 |
| 16992              | 4049               | Lta     | lymphotoxin A                                                                          | 1.92           | 5.51E-02 |
| 17133              | 23764              | Maff    | v-maf musculoaponeurotic fibrosarcoma oncogene family,<br>protein F (avian)            | 1.62           | 3.37E-02 |
| 17135              | 7975               | Mafk    | v-maf musculoaponeurotic fibrosarcoma oncogene family,<br>protein K (avian)            | 1.39           | 4.16E-02 |
| 18036              | 4793               | Nfkbib  | nuclear factor of kappa light polypeptide gene enhancer in B-<br>cells inhibitor, beta | 1.33           | 5.51E-02 |
| 18117              | 10328              | Cox4nb  | COX4 neighbor                                                                          | 1.21           | 5.82E-02 |
| 18130              | 26512              | Ints6   | integrator complex subunit 6                                                           | 0.73           | 5.59E-02 |
| 18286              | 4957               | Odf2    | outer dense fiber of sperm tails 2                                                     | 1.31           | 4.30E-02 |
| 18439              | 5027               | P2rx7   | purinergic receptor P2X, ligand-gated ion channel, 7                                   | 0.75           | 5.69E-02 |
| 18518              | 3476               | Igbp1   | immunoglobulin (CD79A) binding protein 1                                               | 1.14           | 4.64E-02 |
| 18616              | 5178               | Peg3    | paternally expressed 3                                                                 | 0.82           | 8.19E-02 |
| 18667              | 5241               | Pgr     | progesterone receptor                                                                  | 0.8            | 8.88E-02 |
| 19650              | 5933               | Rbl1    | retinoblastoma-like 1 (p107)                                                           | 0.59           | 3.45E-02 |
| 19720              | 5987               | Trim27  | tripartite motif-containing 27                                                         | 0.87           | 9.07E-02 |
| 19752              | 6035               | Rnase1  | ribonuclease, RNase A family, 1 (pancreatic)                                           | 0.57           | 2.98E-02 |
| 19895              | 22934              | Rpia    | ribose 5-phosphate isomerase A                                                         | 0.8            | 4.53E-02 |
| 20295              | 6361               | Ccl17   | chemokine (C-C motif) ligand 17                                                        | 1.91           | 1.12E-03 |
| 20467              | 23309              | Sin3b   | transcriptional regulator, SIN3B (yeast)                                               | 1.21           | 2.59E-02 |
| 20846              | 6772               | Stat1   | signal transducer and activator of transcription 1                                     | 0.81           | 9.65E-02 |
| 20887              | 6817               | Sult1a1 | sulfotransferase family 1A, phenol-preferring, member 1                                | 1.75           | 2.59E-02 |
| 21956              | 7139               | Tnnt2   | troponin T2, cardiac                                                                   | 1.71           | 6.24E-02 |
| 22127              |                    | Tsx     | testis specific X-linked gene                                                          | 1.83           | 8.30E-02 |
| 22590              | 7507               | Xpa     | xeroderma pigmentosum, complementation group A                                         | 1.41           | 4.44E-02 |
| 22619              | 54414              | Siae    | sialic acid acetyltransferase                                                          | 0.84           | 8.16E-02 |
| 22632              | 7528               | Yy1     | YY1 transcription factor                                                               | 0.88           | 6.69E-02 |
| 23954              | 4752               | Nek3    | NIMA (never in mitosis gene a)-related expressed kinase 3                              | 0.69           | 8.73E-02 |
| 26404              | 7786               | Map3k12 | mitogen-activated protein kinase kinase kinase 12                                      | 1.15           | 8.64E-02 |
| 26939              | 55718              | Polr3e  | polymerase (RNA) III (DNA directed) polypeptide E                                      | 1.8            | 6.62E-02 |
| 26942              | 6674               | Spag1   | sperm associated antigen 1                                                             | 0.8            | 8.16E-02 |
| 27274              | 117608             | Zfp354b | zinc finger protein 354B                                                               | 0.65           | 3.45E-02 |

| Mouse<br>Entrez ID | Human<br>Entrez ID | Symbol        | Name                                                                                           | Fold<br>Change | FDR      |
|--------------------|--------------------|---------------|------------------------------------------------------------------------------------------------|----------------|----------|
| 28081              | 84923              | D11Wsu99e     | DNA segment, Chr 11, Wayne State University 99, expressed                                      | 1.14           | 8.63E-02 |
| 53413              | 23265              | Exoc7         | exocyst complex component 7                                                                    | 1.13           | 9.65E-02 |
| 53945              | 30061              | Slc40a1       | solute carrier family 40 (iron-regulated transporter), member 1                                | 0.71           | 4.47E-02 |
| 56310              | 2874               | Gps2          | G protein pathway suppressor 2                                                                 | 1.2            | 9.30E-02 |
| 56314              | 7551               | Zfp113        | zinc finger protein 113                                                                        | 0.72           | 3.41E-02 |
| 56368              | 11068              | Cyb561d2      | cytochrome b-561 domain containing 2                                                           | 0.81           | 6.32E-02 |
| 56454              | 5832               | Aldh18a1      | aldehyde dehydrogenase 18 family, member A1                                                    | 0.78           | 6.59E-02 |
| 56771              | 9477               | Med20         | mediator complex subunit 20                                                                    | 0.8            | 7.27E-02 |
| 56874              | 140545             | Rnf32         | ring finger protein 32                                                                         | 0.75           | 8.30E-02 |
| 57321              | 54386              | Terf2ip       | telomeric repeat binding factor 2, interacting protein                                         | 1.29           | 3.45E-02 |
| 57435              | 729359             | Plin4         | perilipin 4                                                                                    | 2.64           | 2.17E-02 |
| 58801              | 5366               | Pmaip1        | phorbol-12-myristate-13-acetate-induced protein 1                                              | 1.98           | 2.59E-02 |
| 63828              | 64122              | Fn3k          | fructosamine 3 kinase                                                                          | 0.82           | 8.14E-02 |
| 64209              | 9709               | Herpud1       | homocysteine-inducible, endoplasmic reticulum stress-inducible, ubiquitin-like domain member 1 | 1.2            | 7.27E-02 |
| 64934              | 23481              | Pes1          | pescadillo homolog 1, containing BRCT domain (zebrafish)                                       | 0.68           | 2.59E-02 |
| 66059              | 200185             | Krtcap2       | keratinocyte associated protein 2                                                              | 0.94           | 9.96E-02 |
| 66060              | 84418              | 0610010O12Rik | RIKEN cDNA 0610010O12 gene                                                                     | 1.34           | 8.03E-02 |
| 66131              | 54962              | Tipin         | timeless interacting protein                                                                   | 1.2            | 9.31E-02 |
| 66172              | 400569             | Med11         | mediator of RNA polymerase II transcription, subunit 11                                        | 0.82           | 6.16E-02 |
| 66277              | 28999              | Klf15         | homolog ( <i>S. cerevisiae</i> )                                                               | 1.55           | 3.37E-02 |
| 66360              | 92482              | 2310002J21Rik | Kruppel-like factor 15                                                                         | 0.89           | 4.23E-02 |
| 66412              | 91947              | Arrdc4        | RIKEN cDNA 2310002J21 gene                                                                     | 1.36           | 8.88E-02 |
| 66493              | 51258              | Mrpl51        | arrestin domain containing 4                                                                   | 0.61           | 4.44E-02 |
| 66522              | 54858              | Pgpep1        | mitochondrial ribosomal protein L51                                                            | 0.76           | 8.16E-02 |
| 66583              | 51013              | Exosc1        | pyroglutamyl-peptidase I                                                                       | 1.13           | 9.30E-02 |
| 66610              | 51225              | Abi3          | exosome component 1                                                                            | 0.71           | 7.57E-02 |
| 66662              |                    | 5730577I03Rik | ABI gene family, member 3                                                                      | 1.5            | 4.73E-02 |
| 66824              | 29108              | Pycard        | RIKEN cDNA 5730577I03 gene                                                                     | 0.74           | 6.59E-02 |
| 66853              | 57104              | Pnpla2        | PYD and CARD domain containing                                                                 | 1.39           | 7.27E-02 |
| 66917              | 26973              | Chordc1       | patatin-like phospholipase domain containing 2                                                 | 0.76           | 5.51E-02 |
| 66967              | 80267              | Edem3         | cysteine and histidine-rich domain (CHORD)-containing, zinc-binding protein 1                  | 0.88           | 7.57E-02 |
|                    |                    |               | ER degradation enhancer, mannosidase alpha-like 3                                              |                |          |

| Mouse<br>Entrez ID | Human<br>Entrez ID | Symbol        | Name                                                                   | Fold<br>Change | FDR      |
|--------------------|--------------------|---------------|------------------------------------------------------------------------|----------------|----------|
| 67062              | 401612             | Mcart6        | mitochondrial carrier triple repeat 6                                  | 0.81           | 8.55E-02 |
| 67088              | 23066              | Cand2         | cullin-associated and neddylation-dissociated 2 (putative)             | 0.64           | 4.18E-02 |
| 67225              | 55599              | Rnpc3         | RNA-binding region (RNP1, RRM) containing 3                            | 0.77           | 9.29E-02 |
| 67263              | 57688              | Zswim6        | zinc finger, SWIM domain containing 6                                  | 0.83           | 8.64E-02 |
| 67446              | 285193             | Dusp28        | dual specificity phosphatase 28                                        | 1.23           | 5.11E-02 |
| 67477              | 116236             | Abhd15        | abhydrolase domain containing 15                                       | 1.55           | 2.59E-02 |
| 67493              | 79066              | Mett10d       | methyltransferase 10 domain containing                                 | 0.78           | 6.59E-02 |
| 67770              | 79886              | 5830433M19Rik | RIKEN cDNA 5830433M19 gene                                             | 0.68           | 2.98E-02 |
| 67832              | 55299              | Bxdc2         | brix domain containing 2                                               | 0.73           | 4.44E-02 |
| 67862              | 79169              | 2310033P09Rik | RIKEN cDNA 2310033P09 gene                                             | 0.72           | 4.20E-02 |
| 67871              | 92399              | Mrrf          | mitochondrial ribosome recycling factor                                | 0.78           | 5.45E-02 |
| 67880              | 51181              | Dcxr          | dicarbonyl L-xylulose reductase                                        | 1.22           | 8.64E-02 |
| 67980              | 132789             | Gnpda2        | glucosamine-6-phosphate deaminase 2                                    | 0.81           | 5.51E-02 |
| 67996              | 6431               | Sfrs6         | splicing factor, arginine/serine-rich 6                                | 1.15           | 6.55E-02 |
| 68033              | 90639              | Cox19         | COX19 cytochrome c oxidase assembly homolog (S. cerevisiae)            | 0.83           | 3.86E-02 |
| 68082              | 142679             | Dusp19        | dual specificity phosphatase 19                                        | 0.76           | 7.92E-02 |
| 68115              | 79568              | 9430016H08Rik | RIKEN cDNA 9430016H08 gene                                             | 1.21           | 4.44E-02 |
| 68310              | 79830              | Zmym1         | zinc finger, MYM domain containing 1                                   | 0.66           | 4.44E-02 |
| 68763              | 50854              | 1110038B12Rik | RIKEN cDNA 1110038B12 gene                                             | 1.22           | 5.51E-02 |
| 68832              | 60526              | 1110057K04Rik | RIKEN cDNA 1110057K04 gene                                             | 0.82           | 8.64E-02 |
| 69028              | 129531             | Mitd1         | MIT, microtubule interacting and transport, domain containing 1        | 0.78           | 5.45E-02 |
| 69113              | 221120             | Alkbh3        | alkB, alkylation repair homolog 3 (E. coli)                            | 1.31           | 4.18E-02 |
| 69221              |                    | 2410006H16Rik | RIKEN cDNA 2410006H16 gene                                             | 1.23           | 7.21E-02 |
| 69260              | 3622               | Ing2          | inhibitor of growth family, member 2                                   | 1.26           | 5.11E-02 |
| 69309              | 201232             | Slc16a13      | solute carrier family 16 (monocarboxylic acid transporters), member 13 | 0.71           | 7.21E-02 |
| 69434              | 283596             | Snhg10        | small nucleolar RNA host gene (non-protein coding) 10                  | 1.24           | 9.30E-02 |
| 69478              | 145853             | 2300009A05Rik | RIKEN cDNA 2300009A05 gene                                             | 1.31           | 9.07E-02 |
| 69671              | 339456             | Tmem52        | transmembrane protein 52                                               | 1.72           | 9.39E-02 |
| 70369              | 9529               | Bag5          | BCL2-associated athanogene 5                                           | 1.22           | 8.55E-02 |
| 70533              | 91408              | Btf3l4        | basic transcription factor 3-like 4                                    | 1.28           | 4.44E-02 |
| 70807              | 27106              | Arrdc2        | arrestin domain containing 2                                           | 2.3            | 2.17E-02 |

| Mouse<br>Entrez ID | Human<br>Entrez ID | Symbol        | Name                                                             | Fold<br>Change | FDR      |
|--------------------|--------------------|---------------|------------------------------------------------------------------|----------------|----------|
| 70967              | 59271              | 4931408A02Rik | RIKEN cDNA 4931408A02 gene                                       | 1.49           | 4.05E-02 |
| 70981              |                    | 4931423N10Rik | RIKEN cDNA 4931423N10 gene                                       | 1.51           | 7.83E-02 |
| 71020              | 221409             | Spats1        | spermatogenesis associated, serine-rich 1                        | 0.58           | 3.41E-02 |
| 71151              | 112479             | Exod1         | exonuclease domain containing 1                                  | 0.8            | 6.68E-02 |
| 71373              | 51334              | Prr16         | proline rich 16                                                  | 0.55           | 6.68E-02 |
| 71599              | 123228             | Senp8         | SUMO/sentrin specific peptidase 8                                | 0.57           | 2.26E-02 |
| 71704              | 50650              | Arhgef3       | Rho guanine nucleotide exchange factor (GEF) 3                   | 1.37           | 3.53E-02 |
| 71760              | 64850              | Agxt211       | alanine-glyoxylate aminotransferase 2-like 1                     | 2.29           | 7.42E-02 |
| 71970              | 114821             | Scand3        | SCAN domain containing 3                                         | 0.78           | 8.76E-02 |
| 72050              | 79070              | Kdelc1        | KDEL (Lys-Asp-Glu-Leu) containing 1                              | 0.75           | 4.00E-02 |
| 72634              | 11022              | Tdrkh         | tudor and KH domain containing protein                           | 1.29           | 5.45E-02 |
| 72655              |                    | 2810026P18Rik | RIKEN cDNA 2810026P18 gene                                       | 1.27           | 3.37E-02 |
| 72720              | 57209              | Zfp248        | zinc finger protein 248                                          | 0.73           | 8.16E-02 |
| 72807              |                    | Zfp429        | zinc finger protein 429                                          | 0.63           | 4.44E-02 |
| 73533              |                    | 1700080G18Rik | RIKEN cDNA 1700080G18 gene                                       | 1.77           | 1.07E-02 |
| 73668              | 79809              | Ttc21b        | tetratricopeptide repeat domain 21B                              | 0.71           | 4.45E-02 |
| 73893              | 338949             | Tmem202       | transmembrane protein 202                                        | 1.31           | 5.59E-02 |
| 74189              | 116154             | Phactr3       | phosphatase and actin regulator 3                                | 1.21           | 8.88E-02 |
| 74191              | 53829              | P2ry13        | purinergic receptor P2Y, G-protein coupled 13                    | 0.68           | 4.44E-02 |
| 74197              | 2960               | Gtf2e1        | general transcription factor II E, polypeptide 1 (alpha subunit) | 0.8            | 7.21E-02 |
| 74205              | 2181               | Acsl3         | acyl-CoA synthetase long-chain family member 3                   | 1.14           | 6.07E-02 |
| 74255              | 55234              | Smu1          | smu-1 suppressor of mec-8 and unc-52 homolog (C. elegans)        | 1.2            | 6.59E-02 |
| 74471              |                    | 4933440N22Rik | RIKEN cDNA 4933440N22 gene                                       | 1.76           | 5.02E-02 |
| 74646              | 80176              | Spsb1         | splA/ryanodine receptor domain and SOCS box containing 1         | 1.44           | 8.55E-02 |
| 74684              | 146562             | 4930451G09Rik | RIKEN cDNA 4930451G09 gene                                       | 0.74           | 4.38E-02 |
| 75180              | 100129924          | 4930538K18Rik | RIKEN cDNA 4930538K18 gene                                       | 1.5            | 6.72E-02 |
| 75202              |                    | 4930546H06Rik | RIKEN cDNA 4930546H06 gene                                       | 1.93           | 1.07E-02 |
| 75339              | 54737              | Mphosph8      | M-phase phosphoprotein 8                                         | 0.86           | 8.19E-02 |
| 75552              | 344838             | Paqr9         | progesterone and adipoQ receptor family member IX                | 0.82           | 8.19E-02 |
| 75565              | 112869             | Ccdc101       | coiled-coil domain containing 101                                | 1.22           | 8.93E-02 |
| 75613              | 81857              | Med25         | mediator of RNA polymerase II transcription, subunit 25          | 1.2            | 9.31E-02 |
| 75697              | 388125             | Fam148b       | homolog (yeast)                                                  | 1.9            | 9.30E-02 |
| 76375              | 55070              | Det1          | family with sequence similarity 148, member B                    | 0.66           | 4.84E-02 |
|                    |                    |               | de-etiolated homolog 1 (Arabidopsis)                             |                |          |

| Mouse<br>Entrez ID | Human<br>Entrez ID | Symbol        | Name                                                                | Fold<br>Change | FDR      |
|--------------------|--------------------|---------------|---------------------------------------------------------------------|----------------|----------|
| 76574              | 84879              | Mfsd2         | major facilitator superfamily domain containing 2                   | 1.4            | 8.73E-02 |
| 76781              | 64863              | Mettl4        | methyltransferase like 4                                            | 0.66           | 7.48E-02 |
| 76880              |                    | 6430411K18Rik | RIKEN cDNA 6430411K18 gene                                          | 0.58           | 5.69E-02 |
| 76952              | 22978              | Nt5c2         | 5'-nucleotidase, cytosolic II                                       | 1.18           | 7.21E-02 |
| 77043              |                    | 4632433K11Rik | RIKEN cDNA 4632433K11 gene                                          | 1.46           | 2.46E-02 |
| 77125              | 90865              | Il33          | interleukin 33                                                      | 0.68           | 5.51E-02 |
| 78449              |                    | 2700046A07Rik | RIKEN cDNA 2700046A07 gene                                          | 2.14           | 2.93E-02 |
| 78610              | 7405               | Uvrag         | UV radiation resistance associated gene                             | 1.28           | 4.43E-02 |
|                    |                    |               | apolipoprotein B mRNA editing enzyme, catalytic polypeptide 3       |                |          |
| 80287              | 9582               | Apobec3       |                                                                     | 0.62           | 4.09E-02 |
| 80290              | 115330             | Gpr146        | G protein-coupled receptor 146                                      | 1.31           | 5.51E-02 |
| 80750              | 9683               | N4bp1         | NEDD4 binding protein 1                                             | 0.8            | 7.27E-02 |
| 83486              | 10181              | Rbm5          | RNA binding motif protein 5                                         | 0.66           | 7.21E-02 |
| 83673              | 23642              | Snhg1         | small nucleolar RNA host gene (non-protein coding) 1                | 1.28           | 2.59E-02 |
|                    |                    |               | gamma-aminobutyric acid (GABA) A receptor-associated protein-like 2 |                |          |
| 93739              | 11345              | Gabarapl2     |                                                                     | 1.14           | 6.01E-02 |
| 94066              | 64979              | Mrpl36        | mitochondrial ribosomal protein L36                                 | 0.81           | 8.73E-02 |
| 98365              | 89886              | Slamf9        | SLAM family member 9                                                | 1.43           | 9.07E-02 |
| 98685              | 81627              | 1190005F20Rik | RIKEN cDNA 1190005F20 gene                                          | 0.62           | 1.43E-02 |
| 99543              | 56944              | Olfml3        | olfactomedin-like 3                                                 | 0.8            | 8.16E-02 |
| 101185             | 25913              | Pot1a         | protection of telomeres 1A                                          | 0.72           | 2.31E-02 |
| 101694             |                    | AI854517      | expressed sequence AI854517                                         | 1.52           | 3.11E-02 |
| 103784             | 116143             | Wdr92         | WD repeat domain 92                                                 | 0.7            | 4.44E-02 |
| 107569             | 51251              | Nt5c3         | 5'-nucleotidase, cytosolic III                                      | 1.19           | 5.72E-02 |
| 107746             | 2889               | Rapgef1       | Rap guanine nucleotide exchange factor (GEF) 1                      | 1.2            | 8.19E-02 |
| 107770             | 53345              | Tm6sf2        | transmembrane 6 superfamily member 2                                | 0.6            | 8.55E-02 |
| 108832             | 55321              | 5430405G05Rik | RIKEN cDNA 5430405G05 gene                                          | 0.7            | 6.72E-02 |
| 109019             | 64859              | Obfc2a        | oligonucleotide/oligosaccharide-binding fold containing 2A          | 0.68           | 7.27E-02 |
| 109270             | 55615              | Prr5          | proline rich 5 (renal)                                              | 1.62           | 5.45E-02 |
| 109346             | 51239              | Ankrd39       | ankyrin repeat domain 39                                            | 1.23           | 9.90E-02 |
| 116838             | 9699               | Rims2         | regulating synaptic membrane exocytosis 2                           | 1.29           | 5.11E-02 |
| 140629             | 22888              | Ubox5         | U box domain containing 5                                           | 1.27           | 8.88E-02 |
| 140742             | 27244              | Sesn1         | sestrin 1                                                           | 1.21           | 6.52E-02 |
| 140917             | 64858              | Dclre1b       | DNA cross-link repair 1B, PSO2 homolog ( <i>S. cerevisiae</i> )     | 1.47           | 2.98E-02 |

| Mouse<br>Entrez ID | Human<br>Entrez ID | Symbol        | Name                                                           | Fold<br>Change | FDR      |
|--------------------|--------------------|---------------|----------------------------------------------------------------|----------------|----------|
| 170743             | 51284              | Tlr7          | toll-like receptor 7                                           | 1.73           | 4.11E-02 |
| 171285             | 84868              | Havcr2        | hepatitis A virus cellular receptor 2                          | 1.45           | 8.73E-02 |
| 195434             |                    | Utp14b        | UTP14, U3 small nucleolar ribonucleoprotein, homolog B (yeast) | 1.51           | 7.92E-02 |
| 195522             | 51058              | Zfp691        | zinc finger protein 691                                        | 0.73           | 8.73E-02 |
| 207667             | 390598             | Lbxcor1       | ladybird homeobox 1 homolog (Drosophila) corepressor 1         | 1.79           | 7.21E-02 |
| 209707             | 254251             | Lcorl         | ligand dependent nuclear receptor corepressor-like             | 0.64           | 4.18E-02 |
| 210104             | 26149              | Zfp658        | zinc finger protein 658                                        | 0.66           | 4.44E-02 |
| 211798             | 84804              | Mfsd9         | major facilitator superfamily domain containing 9              | 0.75           | 6.32E-02 |
| 213081             | 57728              | Wdr19         | WD repeat domain 19                                            | 0.86           | 5.45E-02 |
| 214552             | 22897              | Cep164        | centrosomal protein 164                                        | 0.81           | 8.30E-02 |
| 214895             | 81562              | Lman2l        | lectin, mannose-binding 2-like                                 | 0.81           | 4.90E-02 |
| 215627             | 728116             | Zbtb8b        | zinc finger and BTB domain containing 8b                       | 0.67           | 5.45E-02 |
| 215693             | 84460              | Zmat1         | zinc finger, matrin type 1                                     | 0.64           | 2.31E-02 |
| 216134             | 8566               | Pdxk          | pyridoxal (pyridoxine, vitamin B6) kinase                      | 1.66           | 2.26E-02 |
| 217827             | 55051              | BC002230      | cDNA sequence BC002230                                         | 1.35           | 4.20E-02 |
| 217837             | 3705               | Itpk1         | inositol 1,3,4-triphosphate 5/6 kinase                         | 1.25           | 6.22E-02 |
| 218772             | 5915               | Rarb          | retinoic acid receptor, beta                                   | 0.72           | 5.03E-02 |
| 219094             | 23351              | 9130227C08Rik | RIKEN cDNA 9130227C08Rik gene                                  | 0.74           | 2.59E-02 |
| 219103             | 55835              | Cenpj         | centromere protein J                                           | 0.69           | 8.14E-02 |
| 224111             | 26043              | Ubxn7         | UBX domain protein 7                                           | 0.78           | 6.32E-02 |
| 224523             |                    | 4732491K20Rik | RIKEN cDNA 4732491K20 gene                                     | 1.4            | 8.55E-02 |
| 224694             | 55552              | Zfp81         | zinc finger protein 81                                         | 1.92           | 3.37E-02 |
| 225745             | 115106             | Haus1         | HAUS augmin-like complex, subunit 1                            | 1.28           | 5.72E-02 |
| 225888             | 51111              | Suv420h1      | suppressor of variegation 4-20 homolog 1 (Drosophila)          | 1.5            | 4.44E-02 |
| 226144             | 10613              | Erlin1        | ER lipid raft associated 1                                     | 0.83           | 8.66E-02 |
| 226153             | 56652              | Peo1          | progressive external ophthalmoplegia 1 (human)                 | 0.82           | 4.16E-02 |
| 227674             | 64794              | Ddx31         | DEAD/H (Asp-Glu-Ala-Asp/His) box polypeptide 31                | 0.77           | 5.09E-02 |
| 229004             | 26205              | Gmeb2         | glucocorticoid modulatory element binding protein 2            | 1.24           | 4.44E-02 |
| 229599             | 148523             | Gm129         | predicted gene 129                                             | 2.09           | 1.36E-02 |
| 230696             | 79078              | AU022252      | expressed sequence AU022252                                    | 0.7            | 4.96E-02 |
| 231214             | 57545              | Cc2d2a        | coiled-coil and C2 domain containing 2A                        | 0.74           | 5.51E-02 |
| 231326             | 132949             | Aasdh         | aminoadipate-semialdehyde dehydrogenase                        | 0.78           | 6.32E-02 |
| 231380             | 55236              | Uba6          | ubiquitin-like modifier activating enzyme 6                    | 0.59           | 4.64E-02 |

| Mouse<br>Entrez ID | Human<br>Entrez ID | Symbol             | Name                                                   | Fold<br>Change | FDR      |
|--------------------|--------------------|--------------------|--------------------------------------------------------|----------------|----------|
| 232560             | 65981              | Caprin2            | caprin family member 2                                 | 0.7            | 5.59E-02 |
| 232816             | 89887              | Zfp628             | zinc finger protein 628                                | 1.46           | 4.38E-02 |
| 235036             | 56342              | Ppan               | peter pan homolog (Drosophila)                         | 1.27           | 5.48E-02 |
| 235040             | 84971              | Atg4d              | autophagy-related 4D (yeast)                           | 0.86           | 2.98E-02 |
| 235441             | 9960               | Usp3               | ubiquitin specific peptidase 3                         | 1.41           | 4.16E-02 |
| 236904             | 80311              | Klhl15             | kelch-like 15 (Drosophila)                             | 1.89           | 8.93E-02 |
| 240334             | 78991              | Pcyox1l            | prenylcysteine oxidase 1 like                          | 0.75           | 7.57E-02 |
| 246196             | 11179              | Zfp277             | zinc finger protein 277                                | 1.28           | 8.73E-02 |
| 268670             |                    | Zfp759             | zinc finger protein 759                                | 0.78           | 7.21E-02 |
| 269952             | 390637             | D330012F22Rik      | RIKEN cDNA D330012F22 gene                             | 0.74           | 9.30E-02 |
| 270156             | 55216              | AU019823           | expressed sequence AU019823                            | 1.24           | 5.51E-02 |
| 280621             | 348303             | BC089491           | cDNA sequence BC089491                                 | 1.5            | 5.45E-02 |
| 282619             | 374897             | Sbsn               | suprabasin                                             | 1.19           | 4.16E-02 |
| 319448             | 22862              | Fndc3a             | fibronectin type III domain containing 3A              | 0.8            | 9.55E-02 |
| 319719             | 375484             | 4732471D19Rik      | RIKEN cDNA 4732471D19 gene                             | 0.82           | 8.66E-02 |
| 320299             | 9657               | Iqcb1              | IQ calmodulin-binding motif containing 1               | 0.66           | 6.07E-02 |
| 320633             | 57684              | Zbtb26             | zinc finger and BTB domain containing 26               | 0.7            | 4.44E-02 |
| 320742             |                    | A230072C01Rik      | RIKEN cDNA A230072C01 gene                             | 0.74           | 6.07E-02 |
| 321000             | 55791              | 4933421E11Rik      | RIKEN cDNA 4933421E11 gene                             | 0.8            | 8.55E-02 |
| 328309             |                    | Gm9776             | predicted gene 9776                                    | 1.25           | 4.00E-02 |
| 329002             | 7776               | Zfp236             | zinc finger protein 236                                | 0.8            | 7.42E-02 |
| 330173             |                    | 2610524H06Rik      | RIKEN cDNA 2610524H06 gene                             | 1.19           | 7.27E-02 |
| 330217             | 79690              | Gal3st4            | galactose-3-O-sulfotransferase 4                       | 0.66           | 2.26E-02 |
| 380753             | 222255             | Atxn7l1            | ataxin 7-like 1                                        | 1.67           | 8.77E-02 |
| 382089             | 134701             | Ripply2            | rippy2 homolog (zebrafish)                             | 1.36           | 4.18E-02 |
| 382252             | 256643             | A830080D01Rik      | RIKEN cDNA A830080D01 gene                             | 0.74           | 8.03E-02 |
| 415115             | 140825             | Neur12             | neuralized-like 2 (Drosophila)                         | 1.29           | 7.57E-02 |
| 432766             |                    |                    |                                                        | 0.76           | 5.45E-02 |
| 546100             |                    | Gm5914             | predicted gene 5914                                    | 1.75           | 4.00E-02 |
| 622320             | 283219             | Kctd21             | potassium channel tetramerisation domain containing 21 | 0.61           | 2.48E-03 |
| 624866             |                    | Gm6534             | predicted gene 6534                                    | 0.57           | 2.59E-02 |
| 665193             |                    |                    |                                                        | 1.49           | 6.75E-02 |
| 665934             |                    | EG665934           | predicted gene, EG665934                               | 1.43           | 8.88E-02 |
| 100039968          | 100130633          | OTTMUSG00000009332 | predicted gene, OTTMUSG00000009332                     | 0.71           | 7.57E-02 |



| Mouse<br>Entrez ID | Human<br>Entrez ID | Symbol  | Name                      | Fold<br>Change | FDR      |
|--------------------|--------------------|---------|---------------------------|----------------|----------|
| 100040174          |                    | Gm2643  | predicted gene 2643       | 1.41           | 4.45E-02 |
| 100040518          |                    |         |                           | 1.5            | 3.86E-02 |
| 100042889          |                    | 1E+08   | predicted gene, 100042889 | 1.71           | 3.11E-02 |
| 100043736          |                    | Gm10762 | predicted gene 10762      | 1.44           | 4.44E-02 |

#### 4.2. 24-week DEGs

This is the complete list of 822 DEGs between diabetic (db/db) and control (db/+) mouse hippocampus at 24 weeks of age.

| Mouse<br>Entrez ID | Human<br>Entrez ID | Symbol | Name                                                                                                  | Fold Change | FDR      |
|--------------------|--------------------|--------|-------------------------------------------------------------------------------------------------------|-------------|----------|
| 11308              | 10006              | Abi1   | abl-interactor 1                                                                                      | 1.25        | 1.00E-02 |
| 11419              | 41                 | Accn2  | amiloride-sensitive cation channel 2, neuronal                                                        | 0.7         | 2.95E-02 |
| 11431              | 52                 | Acp1   | acid phosphatase 1, soluble                                                                           | 1.14        | 8.96E-02 |
| 11472              | 88                 | Actn2  | actinin alpha 2                                                                                       | 0.73        | 8.78E-02 |
| 11489              | 8038               | Adam12 | a disintegrin and metallopeptidase domain 12 (meltrin alpha)                                          | 0.64        | 8.99E-02 |
| 11502              | 8754               | Adam9  | a disintegrin and metallopeptidase domain 9 (meltrin gamma)                                           | 1.14        | 6.56E-02 |
| 11520              | 123                | Plin2  | perilipin 2                                                                                           | 0.72        | 6.92E-02 |
| 11632              | 9049               | Aip    | aryl-hydrocarbon receptor-interacting protein                                                         | 0.91        | 6.35E-02 |
| 11637              | 204                | Ak2    | adenylate kinase 2                                                                                    | 0.8         | 6.47E-02 |
| 11639              | 205                | Ak3l1  | adenylate kinase 3-like 1                                                                             | 0.82        | 4.33E-02 |
| 11666              | 215                | Abcd1  | ATP-binding cassette, sub-family D (ALD), member 1                                                    | 0.77        | 6.73E-02 |
| 11669              | 217                | Aldh2  | aldehyde dehydrogenase 2, mitochondrial                                                               | 0.84        | 5.34E-02 |
| 11765              | 164                | Ap1g1  | adaptor protein complex AP-1, gamma 1 subunit                                                         | 0.85        | 5.86E-02 |
| 11781              | 9179               | Ap4m1  | adaptor-related protein complex AP-4, mu 1                                                            | 0.76        | 1.47E-02 |
| 11821              | 353                | Aprt   | adenine phosphoribosyl transferase                                                                    | 0.87        | 3.48E-02 |
| 11845              | 382                | Arf6   | ADP-ribosylation factor 6                                                                             | 1.1         | 4.33E-02 |
| 11928              | 476                | Atp1a1 | ATPase, Na <sup>+</sup> /K <sup>+</sup> transporting, alpha 1 polypeptide                             | 1.09        | 7.92E-02 |
| 11951              | 516                | Atp5g1 | ATP synthase, H <sup>+</sup> transporting, mitochondrial F0 complex, subunit c (subunit 9), isoform 1 | 0.78        | 3.66E-02 |
| 11991              | 3184               | Hnrnpd | heterogeneous nuclear ribonucleoprotein D                                                             | 1.18        | 3.09E-02 |
| 12036              | 587                | Bcat2  | branched chain aminotransferase 2, mitochondrial                                                      | 0.67        | 8.46E-03 |
| 12040              | 594                | Bckdhb | branched chain ketoacid dehydrogenase E1, beta polypeptide                                            | 0.86        | 4.09E-02 |

| Mouse<br>Entrez ID | Human<br>Entrez ID | Symbol | Name                                                                        | Fold Change | FDR      |
|--------------------|--------------------|--------|-----------------------------------------------------------------------------|-------------|----------|
| 12175              | 663                | Bnip2  | BCL2/adenovirus E1B interacting protein 2                                   | 0.87        | 9.48E-02 |
| 12238              | 23412              | Commd3 | COMM domain containing 3                                                    | 1.09        | 4.49E-02 |
| 12260              | 713                | C1qb   | complement component 1, q subcomponent, beta polypeptide                    | 0.83        | 3.72E-02 |
| 12323              | 816                | Camk2b | calcium/calmodulin-dependent protein kinase II, beta                        | 1.11        | 3.48E-02 |
| 12334              | 824                | Capn2  | calpain 2                                                                   | 0.85        | 9.99E-02 |
| 12336              | 826                | Capns1 | calpain, small subunit 1                                                    | 0.91        | 5.77E-02 |
| 12427              | 8900               | Ccna1  | cyclin A1                                                                   | 1.31        | 6.72E-02 |
| 12445              | 896                | Ccnd3  | cyclin D3                                                                   | 0.8         | 4.86E-02 |
| 12468              | 10574              | Cct7   | chaperonin containing Tcp1, subunit 7 (eta)                                 | 0.92        | 2.57E-02 |
| 12495              | 953                | Entpd1 | ectonucleoside triphosphate diphosphohydrolase 1                            | 0.73        | 1.91E-02 |
| 12497              | 955                | Entpd6 | ectonucleoside triphosphate diphosphohydrolase 6                            | 0.87        | 4.38E-02 |
| 12575              | 1026               | Cdkn1a | cyclin-dependent kinase inhibitor 1A (P21)                                  | 1.74        | 8.51E-02 |
| 12593              | 9425               | Cdyl   | chromodomain protein, Y chromosome-like                                     | 1.37        | 3.34E-02 |
| 12615              | 1058               | Cenpa  | centromere protein A                                                        | 1.48        | 4.48E-02 |
| 12626              | 1070               | Cetn3  | centrin 3                                                                   | 1.24        | 8.46E-03 |
| 12652              | 1113               | Chga   | chromogranin A                                                              | 0.83        | 3.68E-02 |
| 12659              | 5016               | Ovgp1  | oviductal glycoprotein 1                                                    | 1.61        | 3.08E-02 |
| 12684              | 27141              | Cideb  | cell death-inducing DNA fragmentation factor, alpha subunit-like effector B | 0.64        | 4.33E-02 |
| 12696              | 1153               | Cirbp  | cold inducible RNA binding protein                                          | 1.67        | 3.10E-03 |
| 12785              | 7555               | Cnbp   | cellular nucleic acid binding protein                                       | 1.07        | 9.74E-02 |
| 12952              | 1407               | Cry1   | cryptochrome 1 (photolyase-like)                                            | 1.37        | 4.33E-02 |
| 12953              | 1408               | Cry2   | cryptochrome 2 (photolyase-like)                                            | 1.15        | 4.33E-02 |
| 12959              | 1413               | Cryba4 | crystallin, beta A4                                                         | 0.67        | 5.62E-02 |
| 12988              | 1445               | Csk    | c-src tyrosine kinase                                                       | 0.85        | 9.48E-02 |
| 13033              | 1509               | Ctsd   | cathepsin D                                                                 | 0.89        | 4.44E-02 |
| 13169              | 28988              | Dbnl   | drebrin-like                                                                | 0.85        | 7.25E-02 |
| 13198              | 1649               | Ddit3  | DNA-damage inducible transcript 3                                           | 0.8         | 1.47E-02 |
| 13207              | 1655               | Ddx5   | DEAD (Asp-Glu-Ala-Asp) box polypeptide 5                                    | 1.12        | 1.55E-02 |
| 13360              | 1717               | Dhcr7  | 7-dehydrocholesterol reductase                                              | 0.87        | 2.79E-02 |
| 13371              | 1734               | Dio2   | deiodinase, iodothyronine, type II                                          | 0.78        | 5.39E-02 |
| 13595              | 10682              | Ebp    | phenylalkylamine Ca <sup>2+</sup> antagonist (emopamil) binding protein     | 0.79        | 2.22E-02 |
| 13850              | 2053               | Ephx2  | epoxide hydrolase 2, cytoplasmic                                            | 0.7         | 3.36E-02 |
| 13885              | 2098               | Esd    | esterase D/formylglutathione hydrolase                                      | 0.73        | 4.97E-02 |
| 14066              | 2152               | F3     | coagulation factor III                                                      | 1.23        | 3.48E-02 |

| Mouse<br>Entrez ID | Human<br>Entrez ID | Symbol    | Name                                                                | Fold Change | FDR      |
|--------------------|--------------------|-----------|---------------------------------------------------------------------|-------------|----------|
| 14129              | 2209               | Fcgr1     | Fc receptor, IgG, high affinity I                                   | 0.7         | 1.94E-02 |
| 14137              | 2222               | Fdft1     | farnesyl diphosphate farnesyl transferase 1                         | 0.82        | 8.31E-02 |
| 14228              | 2288               | Fkbp4     | FK506 binding protein 4                                             | 0.86        | 3.57E-02 |
| 14371              | 8326               | Fzd9      | frizzled homolog 9 (Drosophila)                                     | 0.65        | 6.57E-02 |
| 14397              | 2557               | Gabra4    | gamma-aminobutyric acid (GABA) A receptor, subunit alpha 4          | 1.25        | 8.47E-03 |
| 14461              | 2624               | Gata2     | GATA binding protein 2                                              | 1.35        | 9.17E-02 |
| 14466              | 2629               | Gba       | glucosidase, beta, acid                                             | 0.86        | 5.92E-02 |
| 14586              | 2675               | Gfra2     | glial cell line derived neurotrophic factor family receptor alpha 2 | 1.24        | 8.52E-02 |
| 14608              | 10888              | Gpr83     | G protein-coupled receptor 83                                       | 0.72        | 4.71E-02 |
| 14705              | 26580              | Bscl2     | Bernardinelli-Seip congenital lipodystrophy 2 homolog (human)       | 0.93        | 5.90E-02 |
| 14712              | 8443               | Gnpat     | glyceronephosphate O-acyltransferase                                | 0.9         | 9.01E-02 |
| 14828              | 3309               | Hspa5     | heat shock protein 5                                                | 0.84        | 1.34E-02 |
| 15077              | 126961             | Hist2h3c1 | histone cluster 2, H3c1                                             | 0.69        | 4.78E-02 |
| 15081              | 3021               | H3f3b     | H3 histone, family 3B                                               | 1.18        | 3.68E-02 |
| 15200              | 1839               | Hbegf     | heparin-binding EGF-like growth factor                              | 0.65        | 2.43E-02 |
| 15211              | 3073               | Hexa      | hexosaminidase A                                                    | 0.86        | 2.57E-02 |
| 15441              | 50809              | Hp1bp3    | heterochromatin protein 1, binding protein 3                        | 1.07        | 9.74E-02 |
| 15468              | 3275               | Prmt2     | protein arginine N-methyltransferase 2                              | 0.85        | 6.60E-02 |
| 15499              | 3297               | Hsf1      | heat shock factor 1                                                 | 0.85        | 8.88E-02 |
| 15528              | 3336               | Hspe1     | heat shock protein 1 (chaperonin 10)                                | 0.88        | 3.36E-02 |
| 15932              | 3425               | Idua      | iduronidase, alpha-L-                                               | 0.8         | 7.07E-02 |
| 15982              | 3475               | Ifrd1     | interferon-related developmental regulator 1                        | 1.14        | 1.94E-02 |
| 16151              | 8517               | Ikbkg     | inhibitor of kappaB kinase gamma                                    | 0.84        | 8.63E-02 |
| 16341              | 3646               | Eif3e     | eukaryotic translation initiation factor 3, subunit E               | 1.09        | 5.15E-02 |
| 16363              | 3660               | Irf2      | interferon regulatory factor 2                                      | 1.22        | 7.82E-02 |
| 16440              | 3710               | Itpr3     | inositol 1,4,5-triphosphate receptor 3                              | 1.3         | 8.13E-02 |
| 16493              | 3741               | Kcna5     | potassium voltage-gated channel, shaker-related subfamily, member 5 | 1.55        | 4.44E-02 |
| 16515              | 3768               | Kcnj12    | potassium inwardly-rectifying channel, subfamily J, member 12       | 0.76        | 4.44E-02 |
| 16520              | 3761               | Kcnj4     | potassium inwardly-rectifying channel, subfamily J, member 4        | 1.55        | 6.14E-02 |
| 16542              | 3791               | Kdr       | kinase insert domain protein receptor                               | 0.72        | 9.28E-02 |
| 16588              | 22944              | Kin       | antigenic determinant of rec-A protein                              | 0.83        | 7.33E-02 |
| 16601              | 687                | Klf9      | Kruppel-like factor 9                                               | 1.23        | 8.78E-02 |
| 16653              | 3845               | Kras      | v-Ki-ras2 Kirsten rat sarcoma viral oncogene homolog                | 1.1         | 7.92E-02 |
| 16816              | 3931               | Lcat      | lecithin cholesterol acyltransferase                                | 0.7         | 7.93E-02 |

| Mouse<br>Entrez ID | Human<br>Entrez ID | Symbol | Name                                                                       | Fold Change | FDR      |
|--------------------|--------------------|--------|----------------------------------------------------------------------------|-------------|----------|
| 16822              | 3937               | Lcp2   | lymphocyte cytosolic protein 2                                             | 0.77        | 6.31E-02 |
| 16832              | 3945               | Ldhb   | lactate dehydrogenase B                                                    | 0.93        | 5.65E-02 |
| 16889              | 3988               | Lipa   | lysosomal acid lipase A                                                    | 0.6         | 3.10E-03 |
| 16979              | 57633              | Lrrn1  | leucine rich repeat protein 1, neuronal                                    | 1.15        | 3.38E-02 |
| 16992              | 4049               | Lta    | lymphotoxin A                                                              | 1.71        | 4.64E-02 |
| 17069              | 4061               | Ly6e   | lymphocyte antigen 6 complex, locus E                                      | 0.9         | 8.17E-02 |
| 17125              | 4086               | Smad1  | MAD homolog 1 (Drosophila)                                                 | 1.22        | 1.51E-02 |
| 17150              | 4237               | Mfap2  | microfibrillar-associated protein 2                                        | 1.34        | 7.72E-02 |
| 17184              | 9782               | Matr3  | matrin 3                                                                   | 1.12        | 4.32E-02 |
| 17281              | 79443              | Fyco1  | FYVE and coiled-coil domain containing 1                                   | 1.26        | 6.02E-02 |
| 17299              | 4234               | Mettl1 | methyltransferase like 1                                                   | 0.77        | 5.77E-02 |
| 17681              | 9242               | Msc    | musculin                                                                   | 0.77        | 9.79E-02 |
|                    |                    |        | methylenetetrahydrofolate dehydrogenase (NAD+ dependent),                  |             |          |
| 17768              | 10797              | Mthfd2 | methenyltetrahydrofolate cyclohydrolase                                    | 0.78        | 6.71E-02 |
| 17850              | 4594               | Mut    | methylmalonyl-Coenzyme A mutase                                            | 0.88        | 5.77E-02 |
| 17960              | 10                 | Nat1   | N-acetyltransferase 1 (arylamine N-acetyltransferase)                      | 0.73        | 2.15E-02 |
| 17978              | 10499              | Ncoa2  | nuclear receptor coactivator 2                                             | 1.16        | 6.81E-02 |
| 18045              | 4801               | Nfyb   | nuclear transcription factor-Y beta                                        | 1.14        | 4.45E-02 |
| 18049              | 4803               | Ngf    | nerve growth factor                                                        | 0.79        | 5.86E-02 |
| 18105              | 4835               | Nqo2   | NAD(P)H dehydrogenase, quinone 2                                           | 0.7         | 1.52E-02 |
| 18108              | 9397               | Nmt2   | N-myristoyltransferase 2                                                   | 0.78        | 6.69E-02 |
| 18120              | 740                | Mrpl49 | mitochondrial ribosomal protein L49                                        | 0.82        | 3.97E-02 |
| 18125              | 4842               | Nos1   | nitric oxide synthase 1, neuronal                                          | 0.77        | 9.48E-02 |
| 18160              | 4881               | Npr1   | natriuretic peptide receptor 1                                             | 1.63        | 7.67E-02 |
| 18260              | 4950               | Ocln   | occludin                                                                   | 1.49        | 8.26E-02 |
| 18293              | 4967               | Ogdh   | oxoglutarate dehydrogenase (lipoamide)                                     | 0.87        | 7.36E-02 |
| 18415              | 22824              | Hspa4l | heat shock protein 4 like                                                  | 0.8         | 5.86E-02 |
| 18430              | 5021               | Oxtr   | oxytocin receptor                                                          | 0.66        | 3.09E-02 |
|                    |                    |        | procollagen-proline, 2-oxoglutarate 4-dioxygenase (proline 4-hydroxylase), |             |          |
| 18451              | 5033               | P4ha1  | alpha 1 polypeptide                                                        | 0.74        | 2.22E-02 |
| 18481              | 5063               | Pak3   | p21 protein (Cdc42/Rac)-activated kinase 3                                 | 0.83        | 9.17E-02 |
| 18526              | 57575              | Pcdh10 | protocadherin 10                                                           | 1.42        | 5.62E-02 |
| 18548              | 5122               | Pcsk1  | proprotein convertase subtilisin/kexin type 1                              | 0.65        | 6.86E-02 |
| 18550              | 5045               | Furin  | furin (paired basic amino acid cleaving enzyme)                            | 1.12        | 6.35E-02 |

| Mouse<br>Entrez ID | Human<br>Entrez ID | Symbol  | Name                                                                                       | Fold Change | FDR      |
|--------------------|--------------------|---------|--------------------------------------------------------------------------------------------|-------------|----------|
| 18569              | 27250              | Pdcd4   | programmed cell death 4                                                                    | 1.1         | 5.70E-02 |
| 18574              | 5153               | Pde1b   | phosphodiesterase 1B, Ca <sup>2+</sup> -calmodulin dependent                               | 1.19        | 3.84E-02 |
| 18715              | 11040              | Pim2    | proviral integration site 2                                                                | 0.85        | 9.62E-02 |
| 18764              | 5311               | Pkd2    | polycystic kidney disease 2                                                                | 1.17        | 5.34E-02 |
| 18786              | 9373               | Plaa    | phospholipase A2, activating protein                                                       | 1.2         | 4.89E-02 |
| 19046              | 5500               | Ppp1cb  | protein phosphatase 1, catalytic subunit, beta isoform                                     | 1.14        | 1.47E-02 |
| 19089              | 5589               | Prkcsh  | protein kinase C substrate 80K-H                                                           | 0.86        | 3.08E-02 |
| 19130              | 5629               | Prox1   | prospero-related homeobox 1                                                                | 1.53        | 5.88E-02 |
| 19201              | 9050               | Pstpip2 | proline-serine-threonine phosphatase-interacting protein 2                                 | 1.64        | 1.47E-02 |
| 19210              | 9791               | Ptdss1  | phosphatidylserine synthase 1                                                              | 0.9         | 5.77E-02 |
| 19309              | 5837               | Pygm    | muscle glycogen phosphorylase                                                              | 0.73        | 3.84E-02 |
| 19357              | 5885               | Rad21   | RAD21 homolog (S. pombe)                                                                   | 1.16        | 6.56E-02 |
| 19645              | 5925               | Rb1     | retinoblastoma 1                                                                           | 1.27        | 1.55E-02 |
| 19655              | 27316              | Rbmx    | RNA binding motif protein, X chromosome                                                    | 1.18        | 3.48E-02 |
| 19727              | 8625               | Rfxank  | regulatory factor X-associated ankyrin-containing protein                                  | 0.81        | 4.11E-02 |
| 19735              | 5997               | Rgs2    | regulator of G-protein signaling 2                                                         | 0.86        | 9.48E-02 |
| 19752              | 6035               | Rnase1  | ribonuclease, RNase A family, 1 (pancreatic)                                               | 0.69        | 6.35E-02 |
| 19769              | 6016               | Rit1    | Ras-like without CAAX 1                                                                    | 0.85        | 7.92E-02 |
| 19777              | 8725               | C80913  | expressed sequence C80913                                                                  | 1.22        | 5.62E-02 |
| 19819              | 246243             | Rnaseh1 | ribonuclease H1                                                                            | 0.81        | 1.55E-02 |
| 20222              | 8175               | Sf3a2   | splicing factor 3a, subunit 2                                                              | 1.22        | 9.06E-02 |
| 20295              | 6361               | Ccl17   | chemokine (C-C motif) ligand 17                                                            | 1.56        | 9.33E-03 |
| 20300              | 6370               | Ccl25   | chemokine (C-C motif) ligand 25                                                            | 1.21        | 5.88E-02 |
| 20316              | 6388               | Sdf2    | stromal cell derived factor 2                                                              | 0.9         | 3.72E-02 |
| 20320              | 27020              | Nptn    | neuroplastin                                                                               | 1.06        | 9.46E-02 |
| 20334              | 10484              | Sec23a  | SEC23A (S. cerevisiae)                                                                     | 1.1         | 9.75E-02 |
| 20393              | 6446               | Sgk1    | serum/glucocorticoid regulated kinase 1                                                    | 1.25        | 2.03E-02 |
| 20437              | 6477               | Siah1a  | seven in absentia 1A                                                                       | 1.1         | 7.82E-02 |
| 20539              | 8140               | Slc7a5  | solute carrier family 7 (cationic amino acid transporter, y <sup>+</sup> system), member 5 | 1.14        | 8.26E-02 |
| 20614              | 6616               | Snap25  | synaptosomal-associated protein 25                                                         | 1.07        | 3.40E-02 |
| 20648              | 6640               | Snta1   | syntrophin, acidic 1                                                                       | 0.82        | 9.90E-02 |
| 20751              | 6697               | Spr     | sepiapterin reductase                                                                      | 0.86        | 7.92E-02 |
| 20768              | 22928              | Seps2   | selenophosphate synthetase 2                                                               | 1.09        | 4.92E-02 |
| 20778              | 949                | Scarb1  | scavenger receptor class B, member 1                                                       | 1.23        | 9.09E-02 |

| Mouse<br>Entrez ID | Human<br>Entrez ID | Symbol   | Name                                                                                        | Fold Change | FDR      |
|--------------------|--------------------|----------|---------------------------------------------------------------------------------------------|-------------|----------|
| 20867              | 10963              | Stip1    | stress-induced phosphoprotein 1                                                             | 0.8         | 2.69E-02 |
| 20872              | 8576               | Stk16    | serine/threonine kinase 16                                                                  | 0.85        | 4.33E-02 |
| 21372              | 6907               | Tb11x    | transducin (beta)-like 1 X-linked                                                           | 0.8         | 4.60E-02 |
| 21375              | 10716              | Tbr1     | T-box brain gene 1                                                                          | 1.32        | 9.48E-02 |
| 21743              | 11185              | Inmt     | indolethylamine N-methyltransferase                                                         | 1.73        | 3.34E-02 |
| 21809              | 7043               | Tgfb3    | transforming growth factor, beta 3                                                          | 0.66        | 4.33E-02 |
| 21835              | 7069               | Thrsp    | thyroid hormone responsive SPOT14 homolog (Rattus)                                          | 0.85        | 4.45E-02 |
| 21929              | 7128               | Tnfaip3  | tumor necrosis factor, alpha-induced protein 3                                              | 0.66        | 3.66E-02 |
| 22027              | 7184               | Hsp90b1  | heat shock protein 90, beta (Grp94), member 1                                               | 0.84        | 6.14E-02 |
| 22130              | 7270               | Ttf1     | transcription termination factor, RNA polymerase I                                          | 0.76        | 2.27E-02 |
| 22152              | 10381              | Tubb3    | tubulin, beta 3                                                                             | 0.88        | 7.67E-02 |
| 22289              | 7403               | Kdm6a    | 4lysine (K)-specific demethylase 6A                                                         | 1.18        | 5.86E-02 |
| 22362              | 7441               | Vpreb1   | pre-B lymphocyte gene 1                                                                     | 0.51        | 2.72E-02 |
| 22367              | 7443               | Vrk1     | vaccinia related kinase 1                                                                   | 1.35        | 8.46E-03 |
| 22377              | 23559              | Wbp1     | WW domain binding protein 1                                                                 | 0.84        | 9.75E-02 |
| 22421              | 7476               | Wnt7a    | wingless-related MMTV integration site 7A                                                   | 0.72        | 7.92E-02 |
| 22433              | 7494               | Xbp1     | X-box binding protein 1                                                                     | 0.8         | 5.50E-02 |
| 22619              | 54414              | Siae     | sialic acid acetyltransferase                                                               | 0.81        | 4.52E-02 |
| 22627              | 7531               | Ywhae    | tyrosine 3-monooxygenase/tryptophan 5-monooxygenase activation protein, epsilon polypeptide | 1.05        | 9.61E-02 |
| 22643              |                    | Zfp101   | zinc finger protein 101                                                                     | 0.69        | 3.34E-02 |
| 23828              | 11149              | Bves     | blood vessel epicardial substance                                                           | 0.68        | 5.15E-02 |
| 23872              | 2114               | Ets2     | E26 avian leukemia oncogene 2, 3' domain                                                    | 1.07        | 9.48E-02 |
| 23873              | 55179              | Faim     | Fas apoptotic inhibitory molecule                                                           | 1.16        | 9.92E-02 |
| 23924              | 11104              | Katna1   | katanin p60 (ATPase-containing) subunit A1                                                  | 0.83        | 9.48E-02 |
| 24004              | 10742              | Rai2     | retinoic acid induced 2                                                                     | 1.28        | 6.14E-02 |
| 24018              | 8732               | Rngtt    | RNA guanylyltransferase and 5'-phosphatase                                                  | 0.82        | 4.44E-02 |
| 24030              | 6183               | Mrps12   | mitochondrial ribosomal protein S12                                                         | 0.82        | 3.34E-02 |
| 26397              | 5606               | Map2k3   | mitogen-activated protein kinase kinase 3                                                   | 0.82        | 9.37E-02 |
| 26404              | 7786               | Map3k12  | mitogen-activated protein kinase kinase kinase 12                                           | 1.22        | 8.46E-03 |
| 26562              | 23154              | Ncdn     | neurochondrin                                                                               | 1.07        | 6.71E-02 |
| 26879              | 8706               | B3galnt1 | UDP-GalNAc:betaGlcNAc beta 1,3-galactosaminyltransferase, polypeptide 1                     | 1.24        | 2.44E-02 |
| 26891              | 51138              | Cops4    | COP9 (constitutive photomorphogenic) homolog, subunit 4 (Arabidopsis thaliana)              | 0.85        | 5.62E-02 |

| Mouse<br>Entrez ID | Human<br>Entrez ID | Symbol      | Name                                                                                                                                                  | Fold Change | FDR      |
|--------------------|--------------------|-------------|-------------------------------------------------------------------------------------------------------------------------------------------------------|-------------|----------|
| 27050              | 6188               | Rps3        | ribosomal protein S3                                                                                                                                  | 1.2         | 2.69E-02 |
| 27059              | 152503             | Sh3d19      | SH3 domain protein D19                                                                                                                                | 0.73        | 1.51E-02 |
| 27274              | 117608             | Zfp354b     | zinc finger protein 354B                                                                                                                              | 0.54        | 1.51E-02 |
| 27388              | 81490              | Ptdss2      | phosphatidylserine synthase 2                                                                                                                         | 0.85        | 9.79E-02 |
| 27402              | 8050               | Pdhx        | pyruvate dehydrogenase complex, component X                                                                                                           | 0.83        | 8.69E-02 |
| 27410              | 21                 | Abca3       | ATP-binding cassette, sub-family A (ABC1), member 3                                                                                                   | 0.87        | 3.45E-02 |
| 27643              | 8266               | Ubl4        | ubiquitin-like 4                                                                                                                                      | 0.74        | 2.09E-02 |
| 27883              | 128989             | D16H22S680E | DNA segment, Chr 16, human D22S680E, expressed                                                                                                        | 0.82        | 1.47E-02 |
| 28040              | 57102              | D6Wsu163e   | DNA segment, Chr 6, Wayne State University 163, expressed                                                                                             | 0.87        | 6.56E-02 |
| 28075              | 27351              | Pppde2      | PPPDE peptidase domain containing 2                                                                                                                   | 0.85        | 1.92E-02 |
| 28185              | 9868               | Tomm70a     | translocase of outer mitochondrial membrane 70 homolog A (yeast)                                                                                      | 1.13        | 9.55E-02 |
| 28240              | 7226               | Trpm2       | transient receptor potential cation channel, subfamily M, member 2                                                                                    | 0.71        | 3.41E-02 |
| 30785              | 83992              | Cttnbp2     | cortactin binding protein 2                                                                                                                           | 1.39        | 9.33E-03 |
| 30878              | 8862               | Apln        | apelin                                                                                                                                                | 0.75        | 3.21E-02 |
| 30926              | 10539              | Glrx3       | glutaredoxin 3                                                                                                                                        | 0.9         | 9.23E-02 |
| 30951              | 57332              | Cbx8        | chromobox homolog 8 (Drosophila Pc class)                                                                                                             | 0.84        | 6.86E-02 |
| 50758              | 64839              | Fbxl17      | F-box and leucine-rich repeat protein 17                                                                                                              | 1.08        | 8.44E-02 |
| 50768              | 10395              | Dlc1        | deleted in liver cancer 1                                                                                                                             | 0.83        | 7.67E-02 |
| 50850              | 6683               | Spast       | spastin                                                                                                                                               | 0.83        | 9.86E-02 |
| 50907              | 10113              | Preb        | prolactin regulatory element binding                                                                                                                  | 0.85        | 5.86E-02 |
| 51788              | 3015               | H2afz       | H2A histone family, member Z                                                                                                                          | 1.31        | 3.30E-02 |
| 52004              | 10263              | Cdk2ap2     | CDK2-associated protein 2                                                                                                                             | 0.75        | 2.49E-02 |
| 52118              | 5817               | Pvr         | poliovirus receptor                                                                                                                                   | 0.79        | 7.72E-02 |
| 52120              | 138050             | Hgsnat      | heparan-alpha-glucosaminide N-acetyltransferase<br>1-acylglycerol-3-phosphate O-acyltransferase 5 (lysophosphatidic acid<br>acyltransferase, epsilon) | 1.16        | 7.21E-02 |
| 52123              | 55326              | Agpat5      | acyltransferase, epsilon)                                                                                                                             | 0.89        | 6.93E-02 |
| 52202              | 23029              | Rbm34       | RNA binding motif protein 34                                                                                                                          | 1.2         | 6.42E-02 |
| 52466              | 113235             | Slc46a1     | solute carrier family 46, member 1                                                                                                                    | 0.87        | 6.71E-02 |
| 52668              | 3429               | Ifi2711     | interferon, alpha-inducible protein 27 like 1                                                                                                         | 0.83        | 9.42E-02 |
| 53412              | 5507               | Ppp1r3c     | protein phosphatase 1, regulatory (inhibitor) subunit 3C                                                                                              | 0.76        | 7.09E-02 |
| 53893              | 11164              | Nudt5       | nudix (nucleoside diphosphate linked moiety X)-type motif 5<br>solute carrier family 7 (cationic amino acid transporter, y+ system), member<br>10     | 0.74        | 3.72E-02 |
| 53896              | 56301              | Slc7a10     | 10                                                                                                                                                    | 0.88        | 7.44E-02 |
| 53945              | 30061              | Slc40a1     | solute carrier family 40 (iron-regulated transporter), member 1                                                                                       | 0.78        | 8.65E-02 |

| Mouse<br>Entrez ID | Human<br>Entrez ID | Symbol    | Name                                                                                                                                | Fold Change | FDR      |
|--------------------|--------------------|-----------|-------------------------------------------------------------------------------------------------------------------------------------|-------------|----------|
| 54122              | 55293              | Uevld     | UEV and lactate/malate dehydrogenase domains                                                                                        | 1.45        | 8.82E-03 |
| 54131              | 3661               | Irf3      | interferon regulatory factor 3                                                                                                      | 0.85        | 9.74E-02 |
| 54169              | 23522              | Myst4     | MYST histone acetyltransferase monocytic leukemia 4<br>elongation of very long chain fatty acids (FEN1/Elo2, SUR4/Elo3, yeast)-like | 1.3         | 1.40E-02 |
| 54326              | 54898              | Elovl2    | 2                                                                                                                                   | 1.16        | 7.44E-02 |
| 54353              | 8935               | Skap2     | src family associated phosphoprotein 2                                                                                              | 0.8         | 7.15E-02 |
| 54357              | 54566              | Epb4.114b | erythrocyte protein band 4.1-like 4b                                                                                                | 1.84        | 6.33E-02 |
| 54678              |                    | Zfp108    | zinc finger protein 108                                                                                                             | 0.83        | 7.15E-02 |
| 55946              | 26985              | Ap3m1     | adaptor-related protein complex 3, mu 1 subunit                                                                                     | 0.88        | 8.14E-02 |
| 55960              | 9166               | Ebag9     | estrogen receptor-binding fragment-associated gene 9                                                                                | 1.2         | 3.21E-02 |
| 55980              | 3612               | Impa1     | inositol (myo)-1(or 4)-monophosphatase 1                                                                                            | 1.11        | 6.71E-02 |
| 56016              | 23593              | Hebp2     | heme binding protein 2                                                                                                              | 0.67        | 7.10E-02 |
| 56032              | 10641              | Tusc4     | tumor suppressor candidate 4                                                                                                        | 0.88        | 6.05E-02 |
| 56043              | 83592              | Akr1e1    | aldo-keto reductase family 1, member E1                                                                                             | 0.86        | 2.72E-02 |
| 56150              | 4085               | Mad211    | MAD2 mitotic arrest deficient-like 1 (yeast)                                                                                        | 1.22        | 6.27E-02 |
| 56196              | 51567              | Ttrap     | TRAF and TNF receptor associated protein                                                                                            | 1.17        | 6.33E-02 |
| 56200              | 9188               | Ddx21     | DEAD (Asp-Glu-Ala-Asp) box polypeptide 21                                                                                           | 1.25        | 9.33E-03 |
| 56289              | 11186              | Rassf1    | Ras association (RalGDS/AF-6) domain family member 1                                                                                | 0.84        | 9.74E-02 |
| 56314              | 7551               | Zfp113    | zinc finger protein 113                                                                                                             | 0.64        | 5.08E-03 |
| 56335              | 56339              | Mettl3    | methyltransferase like 3                                                                                                            | 0.86        | 6.02E-02 |
| 56358              | 51226              | Copz2     | coatamer protein complex, subunit zeta 2                                                                                            | 0.65        | 9.79E-02 |
| 56368              | 11068              | Cyb561d2  | cytochrome b-561 domain containing 2                                                                                                | 0.82        | 2.57E-02 |
| 56369              | 51074              | Apip      | APAF1 interacting protein                                                                                                           | 0.7         | 8.46E-03 |
| 56399              | 10270              | Akap8     | A kinase (PRKA) anchor protein 8                                                                                                    | 1.21        | 4.71E-02 |
| 56440              | 6642               | Snx1      | sorting nexin 1                                                                                                                     | 0.87        | 7.39E-02 |
| 56447              | 22818              | Copz1     | coatamer protein complex, subunit zeta 1                                                                                            | 0.87        | 9.81E-02 |
| 56488              | 29107              | Nxt1      | NTF2-related export protein 1                                                                                                       | 0.83        | 5.77E-02 |
| 56529              | 23478              | Sec11a    | SEC11 homolog A ( <i>S. cerevisiae</i> )                                                                                            | 0.91        | 5.62E-02 |
| 56530              | 10330              | Cnpy2     | canopy 2 homolog (zebrafish)                                                                                                        | 0.88        | 6.71E-02 |
| 56720              | 6999               | Tdo2      | tryptophan 2,3-dioxygenase                                                                                                          | 1.65        | 7.92E-02 |
| 56772              | 10962              | Mllt11    | myeloid/lymphoid or mixed-lineage leukemia (trithorax homolog, <i>Drosophila</i> ); translocated to, 11                             | 1.1         | 8.94E-02 |
| 56874              | 140545             | Rnf32     | ring finger protein 32                                                                                                              | 0.76        | 9.97E-02 |
| 57262              |                    | Retnla    | resistin like alpha                                                                                                                 | 4.73        | 4.97E-02 |



| Mouse<br>Entrez ID | Human<br>Entrez ID | Symbol        | Name                                                                                           | Fold Change | FDR      |
|--------------------|--------------------|---------------|------------------------------------------------------------------------------------------------|-------------|----------|
| 57321              | 54386              | Terf2ip       | telomeric repeat binding factor 2, interacting protein                                         | 1.27        | 6.00E-02 |
| 57344              | 57412              | As3mt         | arsenic (+3 oxidation state) methyltransferase                                                 | 0.77        | 7.25E-02 |
| 57753              | 64318              | Noc3l         | nucleolar complex associated 3 homolog (S. cerevisiae)                                         | 0.73        | 5.35E-02 |
| 57816              | 54997              | Tesc          | tescalcin                                                                                      | 0.81        | 2.49E-02 |
| 58521              | 23741              | Eid1          | EP300 interacting inhibitor of differentiation 1                                               | 1.08        | 8.17E-02 |
| 59021              | 5862               | Rab2a         | RAB2A, member RAS oncogene family                                                              | 1.07        | 9.28E-02 |
| 59030              | 8195               | Mkks          | McKusick-Kaufman syndrome protein                                                              | 0.76        | 1.00E-02 |
| 59058              | 27319              | Bhlhe22       | basic helix-loop-helix family, member e22                                                      | 1.1         | 8.78E-02 |
| 60315              | 60314              | Myg1          | melanocyte proliferating gene 1                                                                | 0.86        | 6.43E-02 |
| 64136              | 23753              | Sdf2l1        | stromal cell-derived factor 2-like 1                                                           | 0.52        | 4.49E-02 |
| 64658              | 64432              | Mrps25        | mitochondrial ribosomal protein S25                                                            | 0.83        | 5.34E-02 |
| 64659              | 63931              | Mrps14        | mitochondrial ribosomal protein S14                                                            | 0.85        | 7.15E-02 |
| 64707              | 79723              | Suv39h2       | suppressor of variegation 3-9 homolog 2 (Drosophila)                                           | 0.78        | 9.74E-02 |
| 64934              | 23481              | Pes1          | pescadillo homolog 1, containing BRCT domain (zebrafish)                                       | 0.57        | 8.46E-03 |
| 65102              | 60491              | Nif3l1        | Ngg1 interacting factor 3-like 1 (S. pombe)                                                    | 0.86        | 6.56E-02 |
| 66043              | 513                | Atp5d         | ATP synthase, H <sup>+</sup> transporting, mitochondrial F1 complex, delta subunit             | 0.94        | 5.59E-02 |
| 66050              |                    | 0610009B22Rik | RIKEN cDNA 0610009B22 gene                                                                     | 0.91        | 9.23E-02 |
| 66052              | 6391               | Sdhc          | succinate dehydrogenase complex, subunit C, integral membrane protein                          | 0.92        | 9.81E-02 |
| 66061              | 255758             | Tctex1d2      | Tctex1 domain containing 2                                                                     | 1.24        | 1.55E-02 |
| 66072              | 54949              | 0610038F07Rik | RIKEN cDNA 0610038F07 gene                                                                     | 0.86        | 5.77E-02 |
| 66077              | 54998              | Aurkaip1      | aurora kinase A interacting protein 1                                                          | 0.88        | 5.38E-02 |
| 66120              | 51303              | Fkbp11        | FK506 binding protein 11                                                                       | 0.79        | 9.01E-02 |
| 66124              | 126119             | Josd2         | Josephin domain containing 2                                                                   | 0.81        | 6.92E-02 |
| 66131              | 54962              | Tipin         | timeless interacting protein                                                                   | 1.34        | 1.34E-02 |
| 66172              | 400569             | Med11         | mediator of RNA polymerase II transcription, subunit 11 homolog (S. cerevisiae)                | 0.73        | 1.91E-02 |
| 66194              | 65263              | Pycrl         | pyrroline-5-carboxylate reductase-like                                                         | 0.77        | 3.11E-02 |
| 66202              | 57456              | 1110059G10Rik | RIKEN cDNA 1110059G10 gene                                                                     | 1.15        | 6.31E-02 |
| 66234              | 6307               | Sc4mol        | sterol-C4-methyl oxidase-like                                                                  | 0.72        | 2.66E-02 |
| 66248              | 29880              | Alg5          | asparagine-linked glycosylation 5 homolog (yeast, dolichyl-phosphate beta-glucosyltransferase) | 1.25        | 4.52E-02 |
| 66259              | 55450              | Camk2n1       | calcium/calmodulin-dependent protein kinase II inhibitor 1                                     | 1.14        | 7.67E-02 |
| 66268              | 84992              | Pigyl         | phosphatidylinositol glycan anchor biosynthesis, class Y-like                                  | 0.86        | 4.78E-02 |
| 66273              | 28971              | 1810020D17Rik | RIKEN cDNA 1810020D17 gene                                                                     | 0.84        | 7.92E-02 |

| Mouse<br>Entrez ID | Human<br>Entrez ID | Symbol        | Name                                                                      | Fold Change | FDR      |
|--------------------|--------------------|---------------|---------------------------------------------------------------------------|-------------|----------|
| 66300              | 255783             | 2610014I16Rik | RIKEN cDNA 2610014I16 gene                                                | 0.89        | 8.88E-02 |
| 66302              | 51115              | Fam82b        | family with sequence similarity 82, member B                              | 0.8         | 4.64E-02 |
| 66308              | 136647             | 2810021B07Rik | RIKEN cDNA 2810021B07 gene                                                | 1.25        | 6.35E-02 |
| 66336              | 401541             | Cenpp         | centromere protein P                                                      | 1.4         | 4.64E-02 |
| 66397              | 51128              | Sar1b         | SAR1 gene homolog B ( <i>S. cerevisiae</i> )                              | 1.09        | 4.01E-02 |
| 66400              | 84266              | Alkbh7        | alkB, alkylation repair homolog 7 ( <i>E. coli</i> )                      | 0.84        | 3.99E-02 |
| 66423              | 55352              | 2410022L05Rik | RIKEN cDNA 2410022L05 gene                                                | 0.83        | 5.86E-02 |
| 66439              | 119032             | 2010012O05Rik | RIKEN cDNA 2010012O05 gene                                                | 1.2         | 9.05E-02 |
| 66455              | 245812             | Cnpy4         | canopy 4 homolog (zebrafish)                                              | 0.79        | 9.17E-02 |
| 66464              | 6883               | Taf12         | TAF12 RNA polymerase II, TATA box binding protein (TBP)-associated factor | 0.73        | 1.95E-02 |
| 66493              | 51258              | Mrpl51        | mitochondrial ribosomal protein L51                                       | 0.59        | 1.96E-02 |
| 66500              | 148867             | Slc30a7       | solute carrier family 30 (zinc transporter), member 7                     | 0.83        | 9.10E-02 |
| 66514              | 80150              | Asrg1l        | asparaginase like 1                                                       | 0.86        | 8.78E-02 |
| 66523              | 128061             | 2810004N23Rik | RIKEN cDNA 2810004N23 gene                                                | 0.69        | 2.43E-02 |
| 66538              | 91582              | Rps19bp1      | ribosomal protein S19 binding protein 1                                   | 0.88        | 9.01E-02 |
| 66583              | 51013              | Exosc1        | exosome component 1                                                       | 1.16        | 4.33E-02 |
| 66596              | 2971               | Gtf3a         | general transcription factor III A                                        | 0.89        | 8.29E-02 |
| 66599              | 201299             | Rdm1          | RAD52 motif 1                                                             | 0.76        | 7.22E-02 |
| 66606              | 255252             | Lrrc57        | leucine rich repeat containing 57                                         | 1.19        | 6.92E-02 |
| 66615              | 23192              | Atg4b         | autophagy-related 4B (yeast)                                              | 0.85        | 6.35E-02 |
| 66645              | 55269              | Pspc1         | paraspeckle protein 1                                                     | 1.2         | 4.89E-02 |
| 66646              | 6120               | Rpe           | ribulose-5-phosphate-3-epimerase                                          | 0.82        | 8.26E-02 |
| 66682              | 126003             | Trappc5       | trafficking protein particle complex 5                                    | 0.9         | 7.62E-02 |
| 66789              | 199857             | Alg14         | asparagine-linked glycosylation 14 homolog (yeast)                        | 0.82        | 5.59E-02 |
| 66795              | 83734              | Atg10         | autophagy-related 10 (yeast)                                              | 1.19        | 4.32E-02 |
| 66801              | 79706              | Prkrip1       | Prkr interacting protein 1 (IL11 inducible)                               | 0.79        | 5.88E-02 |
| 66816              | 83591              | Thap2         | THAP domain containing, apoptosis associated protein 2                    | 1.39        | 6.12E-02 |
| 66821              | 617                | Bcs1l         | BCS1-like (yeast)                                                         | 0.83        | 4.49E-02 |
| 66844              | 29095              | Ormdl2        | ORM1-like 2 ( <i>S. cerevisiae</i> )                                      | 0.76        | 1.59E-02 |
| 66870              | 26135              | Serbp1        | serpine1 mRNA binding protein 1                                           | 1.08        | 5.34E-02 |
| 66877              | 51340              | Crnk1l        | Crn, crooked neck-like 1 ( <i>Drosophila</i> )                            | 0.83        | 5.35E-02 |
| 66878              | 8780               | Riok3         | RIO kinase 3 (yeast)                                                      | 1.14        | 4.77E-02 |
| 66885              | 36                 | Acadsb        | acyl-Coenzyme A dehydrogenase, short/branched chain                       | 0.88        | 3.23E-02 |

| Mouse<br>Entrez ID | Human<br>Entrez ID | Symbol        | Name                                                                                                             | Fold Change | FDR      |
|--------------------|--------------------|---------------|------------------------------------------------------------------------------------------------------------------|-------------|----------|
| 66902              | 4507               | Mtap          | methylthioadenosine phosphorylase<br>cysteine and histidine-rich domain (CHORD)-containing, zinc-binding protein | 0.79        | 4.21E-02 |
| 66917              | 26973              | Chordc1       | 1                                                                                                                | 0.76        | 1.59E-02 |
| 66922              | 22800              | Rras2         | related RAS viral (r-ras) oncogene homolog 2                                                                     | 1.22        | 9.79E-02 |
| 66926              | 51605              | Trmt6         | tRNA methyltransferase 6 homolog ( <i>S. cerevisiae</i> )                                                        | 1.19        | 7.45E-02 |
| 66950              | 55248              | Tmem206       | transmembrane protein 206                                                                                        | 0.81        | 9.74E-02 |
| 66975              | 80006              | 2410002O22Rik | RIKEN cDNA 2410002O22 gene                                                                                       | 0.87        | 9.58E-02 |
| 66980              | 64429              | Zdhhc6        | zinc finger, DHHC domain containing 6                                                                            | 0.77        | 7.82E-02 |
| 66983              | 91603              | Zfp830        | zinc finger protein 830                                                                                          | 0.84        | 9.79E-02 |
| 66989              | 222658             | Kctd20        | potassium channel tetramerisation domain containing 20                                                           | 0.85        | 5.86E-02 |
| 66998              | 5711               | Psmc5         | proteasome (prosome, macropain) 26S subunit, non-ATPase, 5                                                       | 0.89        | 8.44E-02 |
| 67006              | 493856             | Cisd2         | CDGSH iron sulfur domain 2                                                                                       | 1.14        | 6.92E-02 |
| 67010              | 10179              | Rbm7          | RNA binding motif protein 7                                                                                      | 1.15        | 5.72E-02 |
| 67039              | 58517              | Rbm25         | RNA binding motif protein 25                                                                                     | 1.24        | 2.27E-02 |
| 67043              | 94056              | Syap1         | synapse associated protein 1                                                                                     | 1.15        | 3.08E-02 |
| 67057              | 10138              | Yaf2          | YY1 associated factor 2                                                                                          | 1.09        | 5.62E-02 |
| 67062              | 401612             | Mcart6        | mitochondrial carrier triple repeat 6                                                                            | 0.8         | 6.39E-02 |
| 67064              | 57132              | Chmp1b        | chromatin modifying protein 1B                                                                                   | 0.89        | 7.25E-02 |
| 67089              | 5706               | Psmc6         | proteasome (prosome, macropain) 26S subunit, ATPase, 6                                                           | 0.92        | 7.82E-02 |
| 67105              | 29090              | 1700034H14Rik | RIKEN cDNA 1700034H14 gene                                                                                       | 0.84        | 5.52E-02 |
| 67126              | 514                | Atp5e         | ATP synthase, H <sup>+</sup> transporting, mitochondrial F1 complex, epsilon subunit                             | 0.95        | 7.15E-02 |
| 67128              | 7326               | Ube2g1        | ubiquitin-conjugating enzyme E2G 1 (UBC7 homolog, <i>C. elegans</i> )                                            | 1.17        | 7.53E-02 |
| 67154              | 92140              | Mtdh          | metadherin                                                                                                       | 1.17        | 3.40E-02 |
| 67158              | 84826              | Sft2d3        | SFT2 domain containing 3                                                                                         | 1.41        | 3.96E-02 |
| 67204              | 8894               | Eif2s2        | eukaryotic translation initiation factor 2, subunit 2 (beta)                                                     | 1.17        | 5.34E-02 |
| 67236              | 51550              | 2810452K22Rik | RIKEN cDNA 2810452K22 gene                                                                                       | 1.1         | 5.86E-02 |
| 67249              | 55296              | Tbc1d19       | TBC1 domain family, member 19                                                                                    | 0.88        | 4.78E-02 |
| 67279              | 51003              | Med31         | mediator of RNA polymerase II transcription, subunit 31 homolog (yeast)                                          | 0.86        | 2.26E-02 |
| 67291              | 339230             | Ccdc137       | coiled-coil domain containing 137                                                                                | 0.86        | 8.44E-02 |
| 67305              | 2882               | Gpx7          | glutathione peroxidase 7                                                                                         | 0.85        | 7.10E-02 |
| 67371              | 112495             | Gtf3c6        | general transcription factor IIIC, polypeptide 6, alpha                                                          | 0.8         | 3.08E-02 |
| 67437              | 6747               | Ssr3          | signal sequence receptor, gamma                                                                                  | 1.09        | 3.41E-02 |
| 67475              | 56605              | Ero1lb        | ERO1-like beta ( <i>S. cerevisiae</i> )                                                                          | 0.83        | 3.21E-02 |
| 67477              | 116236             | Abhd15        | abhydrolase domain containing 15                                                                                 | 1.36        | 4.89E-02 |

| Mouse<br>Entrez ID | Human<br>Entrez ID | Symbol        | Name                                                        | Fold Change | FDR      |
|--------------------|--------------------|---------------|-------------------------------------------------------------|-------------|----------|
| 67493              | 79066              | Mett10d       | methyltransferase 10 domain containing                      | 0.69        | 1.66E-02 |
| 67501              | 152137             | Ccdc50        | coiled-coil domain containing 50                            | 0.83        | 8.56E-02 |
| 67516              | 386618             | Kctd4         | potassium channel tetramerisation domain containing 4       | 1.23        | 6.64E-02 |
| 67526              | 9140               | Atg12         | autophagy-related 12 (yeast)                                | 0.84        | 3.97E-02 |
| 67538              | 140831             | Zswim3        | zinc finger, SWIM domain containing 3                       | 0.65        | 2.47E-02 |
| 67544              | 84498              | Fam120b       | family with sequence similarity 120, member B               | 0.84        | 3.09E-02 |
| 67549              | 51463              | Gpr89         | G protein-coupled receptor 89                               | 0.81        | 4.49E-02 |
| 67675              | 51596              | Cuta          | cutA divalent cation tolerance homolog (E. coli)            | 0.88        | 2.28E-02 |
| 67695              | 100128731          | 2310016E02Rik | RIKEN cDNA 2310016E02 gene                                  | 0.85        | 4.94E-02 |
| 67707              | 79590              | Mrpl24        | mitochondrial ribosomal protein L24                         | 0.89        | 5.77E-02 |
| 67729              | 54682              | Mansc1        | MANSC domain containing 1                                   | 1.38        | 5.09E-02 |
| 67760              | 54407              | Slc38a2       | solute carrier family 38, member 2                          | 1.18        | 6.33E-02 |
| 67767              | 84522              | Jagn1         | jagunal homolog 1 (Drosophila)                              | 0.89        | 3.53E-02 |
| 67832              | 55299              | Bxdc2         | brix domain containing 2                                    | 0.79        | 5.70E-02 |
| 67838              | 51726              | Dnajb11       | DnaJ (Hsp40) homolog, subfamily B, member 11                | 0.75        | 2.03E-02 |
| 67865              | 6001               | Rgs10         | regulator of G-protein signalling 10                        | 0.87        | 7.21E-02 |
| 67871              | 92399              | Mrrf          | mitochondrial ribosome recycling factor                     | 0.69        | 8.46E-03 |
| 67872              | 54780              | Nsmce4a       | non-SMC element 4 homolog A (S. cerevisiae)                 | 1.09        | 9.17E-02 |
| 67883              | 80146              | Uxs1          | UDP-glucuronate decarboxylase 1                             | 1.14        | 7.44E-02 |
| 67895              | 5464               | Ppa1          | pyrophosphatase (inorganic) 1                               | 0.91        | 3.68E-02 |
| 67902              | 25870              | Sumf2         | sulfatase modifying factor 2                                | 0.81        | 2.34E-02 |
| 67966              | 54819              | Zcchc10       | zinc finger, CCHC domain containing 10                      | 1.16        | 9.06E-02 |
| 67980              | 132789             | Gnpda2        | glucosamine-6-phosphate deaminase 2                         | 0.85        | 8.68E-02 |
| 67996              | 6431               | Sfrs6         | splicing factor, arginine/serine-rich 6                     | 1.27        | 1.34E-02 |
| 68024              | 8347               | Hist1h2bc     | histone cluster 1, H2bc                                     | 0.87        | 2.69E-02 |
| 68033              | 90639              | Cox19         | COX19 cytochrome c oxidase assembly homolog (S. cerevisiae) | 0.8         | 3.23E-02 |
| 68066              | 51629              | Slc25a39      | solute carrier family 25, member 39                         | 0.89        | 7.71E-02 |
| 68082              | 142679             | Dusp19        | dual specificity phosphatase 19                             | 0.75        | 3.09E-02 |
| 68092              | 22916              | Ncbp2         | nuclear cap binding protein subunit 2                       | 0.88        | 3.34E-02 |
| 68115              | 79568              | 9430016H08Rik | RIKEN cDNA 9430016H08 gene                                  | 1.14        | 9.38E-02 |
| 68128              |                    | C030044B11Rik | RIKEN cDNA C030044B11 gene                                  | 1.15        | 5.77E-02 |
| 68152              | 257415             | 5830415L20Rik | RIKEN cDNA 5830415L20 gene                                  | 1.17        | 4.49E-02 |
| 68177              | 84650              | Ebpl          | emopamil binding protein-like                               | 0.83        | 3.09E-02 |
| 68184              | 8562               | Denr          | density-regulated protein                                   | 1.11        | 9.80E-02 |

| Mouse<br>Entrez ID | Human<br>Entrez ID | Symbol        | Name                                                               | Fold Change | FDR      |
|--------------------|--------------------|---------------|--------------------------------------------------------------------|-------------|----------|
| 68187              | 57579              | Fam135a       | family with sequence similarity 135, member A                      | 1.26        | 4.68E-02 |
| 68240              | 6119               | Rpa3          | replication protein A3                                             | 0.83        | 6.14E-02 |
| 68241              | 84331              | 9530058B02Rik | RIKEN cDNA 9530058B02 gene                                         | 0.84        | 9.28E-02 |
| 68310              | 79830              | Zmym1         | zinc finger, MYM domain containing 1                               | 0.8         | 9.48E-02 |
| 68332              | 644096             | Sdhaf1        | succinate dehydrogenase complex assembly factor 1                  | 1.18        | 4.15E-02 |
| 68347              | 84326              | 0610011F06Rik | RIKEN cDNA 0610011F06 gene                                         | 0.85        | 3.96E-02 |
| 68355              |                    | 2010204K13Rik | RIKEN cDNA 2010204K13 gene                                         | 0.85        | 5.62E-02 |
| 68396              | 9027               | Cml4          | camello-like 4                                                     | 0.77        | 6.09E-02 |
| 68523              | 51647              | Fam96b        | family with sequence similarity 96, member B                       | 0.84        | 7.92E-02 |
| 68533              | 10200              | Mphosph6      | M phase phosphoprotein 6                                           | 1.24        | 6.35E-02 |
| 68603              | 10654              | Pmvk          | phosphomevalonate kinase                                           | 0.86        | 7.12E-02 |
| 68606              | 9647               | Ppm1f         | protein phosphatase 1F (PP2C domain containing)                    | 0.85        | 8.51E-02 |
| 68644              | 25864              | Abhd14a       | abhydrolase domain containing 14A                                  | 0.88        | 3.95E-02 |
| 68659              | 51313              | 1110032E23Rik | RIKEN cDNA 1110032E23 gene                                         | 1.3         | 6.05E-02 |
| 68667              | 54795              | Trpm4         | transient receptor potential cation channel, subfamily M, member 4 | 1.27        | 5.85E-02 |
| 68695              | 374659             | Hddc3         | HD domain containing 3                                             | 0.84        | 5.34E-02 |
| 68738              | 84532              | Acss1         | acyl-CoA synthetase short-chain family member 1                    | 0.83        | 2.66E-02 |
| 68758              | 83451              | Abhd11        | abhydrolase domain containing 11                                   | 0.86        | 4.26E-02 |
| 68763              | 50854              | 1110038B12Rik | RIKEN cDNA 1110038B12 gene                                         | 1.21        | 1.53E-02 |
| 68832              | 60526              | 1110057K04Rik | RIKEN cDNA 1110057K04 gene                                         | 0.85        | 4.73E-02 |
| 68943              | 65018              | Pink1         | PTEN induced putative kinase 1                                     | 1.07        | 6.14E-02 |
| 69010              | 25847              | Anapc13       | anaphase promoting complex subunit 13                              | 0.9         | 8.52E-02 |
| 69049              |                    | Cml5          | camello-like 5                                                     | 0.68        | 3.09E-02 |
| 69101              | 150223             | Ydjc          | YdjC homolog (bacterial)                                           | 0.79        | 7.07E-02 |
| 69113              | 221120             | Alkbh3        | alkB, alkylation repair homolog 3 (E. coli)                        | 1.21        | 7.28E-02 |
| 69142              |                    | Cd209f        | CD209f antigen                                                     | 0.6         | 6.69E-02 |
| 69156              | 118881             | Comtd1        | catechol-O-methyltransferase domain containing 1                   | 0.81        | 6.39E-02 |
| 69215              | 112483             | Sat2          | spermidine/spermine N1-acetyl transferase 2                        | 1.27        | 4.82E-02 |
| 69256              |                    | Zfp397        | zinc finger protein 397                                            | 0.86        | 7.92E-02 |
| 69434              | 283596             | Snhg10        | small nucleolar RNA host gene (non-protein coding) 10              | 1.24        | 8.29E-02 |
| 69487              | 79133              | 2310003L22Rik | RIKEN cDNA 2310003L22 gene                                         | 0.86        | 7.71E-02 |
| 69528              | 123775             | 1700030J22Rik | RIKEN cDNA 1700030J22 gene                                         | 0.68        | 1.51E-02 |
| 69581              | 58480              | Rhou          | ras homolog gene family, member U                                  | 1.22        | 7.92E-02 |
| 69641              |                    | Wdr20a        | WD repeat domain 20A                                               | 1.27        | 1.94E-02 |

| Mouse<br>Entrez ID | Human<br>Entrez ID | Symbol        | Name                                                                             | Fold Change | FDR      |
|--------------------|--------------------|---------------|----------------------------------------------------------------------------------|-------------|----------|
| 69719              | 790                | Cad           | carbamoyl-phosphate synthetase 2, aspartate transcarbamylase, and dihydroorotase | 0.76        | 2.66E-02 |
| 69790              | 90390              | Med30         | mediator complex subunit 30                                                      | 1.21        | 6.71E-02 |
| 69802              | 1353               | Cox11         | COX11 homolog, cytochrome c oxidase assembly protein (yeast)                     | 1.15        | 5.34E-02 |
| 70025              | 11332              | Acot7         | acyl-CoA thioesterase 7                                                          | 0.92        | 4.85E-02 |
| 70103              | 10467              | Znhit1        | zinc finger, HIT domain containing 1                                             | 0.89        | 4.71E-02 |
| 70152              | 25840              | Mettl7a1      | methyltransferase like 7A1                                                       | 0.79        | 5.77E-02 |
| 70335              | 92840              | Reep6         | receptor accessory protein 6                                                     | 0.72        | 1.00E-02 |
| 70356              | 6767               | St13          | suppression of tumorigenicity 13                                                 | 0.81        | 3.48E-02 |
| 70377              | 91319              | Der13         | Der1-like domain family, member 3                                                | 0.5         | 5.02E-02 |
| 70396              | 54529              | Asnsd1        | asparagine synthetase domain containing 1                                        | 0.87        | 4.33E-02 |
| 70470              | 58490              | Rprd1b        | regulation of nuclear pre-mRNA domain containing 1B                              | 0.82        | 8.56E-02 |
| 70481              | 9240               | Pnma1         | paraneoplastic antigen MA1                                                       | 0.64        | 2.39E-02 |
| 70533              | 91408              | Btf3l4        | basic transcription factor 3-like 4                                              | 1.32        | 9.42E-03 |
| 70575              | 81577              | Gfod2         | glucose-fructose oxidoreductase domain containing 2                              | 0.8         | 6.71E-02 |
| 70727              | 221002             | Rasgef1a      | RasGEF domain family, member 1A                                                  | 1.18        | 5.62E-02 |
| 70834              | 9043               | Spag9         | sperm associated antigen 9                                                       | 1.09        | 6.35E-02 |
| 70954              |                    | 4922502B01Rik | RIKEN cDNA 4922502B01 gene                                                       | 0.68        | 4.76E-02 |
| 71020              | 221409             | Spats1        | spermatogenesis associated, serine-rich 1                                        | 0.68        | 9.23E-02 |
| 71116              | 53407              | Stx18         | syntaxin 18                                                                      | 0.85        | 9.55E-02 |
| 71206              | 83473              | Katnal2       | katanin p60 subunit A-like 2                                                     | 0.77        | 9.48E-02 |
| 71238              | 57001              | Acn9          | ACN9 homolog (S. cerevisiae)                                                     | 0.83        | 8.12E-02 |
| 71275              | 122945             | 4933437F05Rik | RIKEN cDNA 4933437F05 gene                                                       | 0.58        | 3.72E-02 |
| 71435              | 57584              | Arhgap21      | Rho GTPase activating protein 21                                                 | 1.14        | 5.86E-02 |
| 71492              | 55212              | Bbs7          | Bardet-Biedl syndrome 7 (human)                                                  | 0.83        | 8.63E-02 |
| 71599              | 123228             | Senp8         | SUMO/sentrin specific peptidase 8                                                | 0.63        | 1.00E-02 |
| 71643              | 91431              | 4930422G04Rik | RIKEN cDNA 4930422G04 gene                                                       | 1.41        | 7.25E-02 |
| 71675              | 84542              | 0610010F05Rik | RIKEN cDNA 0610010F05 gene                                                       | 1.15        | 5.86E-02 |
| 71752              | 2976               | Gtf3c2        | general transcription factor IIIC, polypeptide 2, beta                           | 1.18        | 5.62E-02 |
| 71760              | 64850              | Agxt2l1       | alanine-glyoxylate aminotransferase 2-like 1                                     | 2.57        | 8.47E-03 |
| 71778              | 51088              | Klhl5         | kelch-like 5 (Drosophila)                                                        | 1.96        | 3.56E-02 |
| 71780              | 51477              | Isyna1        | myo-inositol 1-phosphate synthase A1                                             | 0.69        | 3.08E-02 |
| 71838              | 51533              | Phf7          | PHD finger protein 7                                                             | 1.29        | 5.91E-02 |
| 71853              | 10130              | Pdia6         | protein disulfide isomerase associated 6                                         | 0.66        | 6.08E-03 |

| Mouse<br>Entrez ID | Human<br>Entrez ID | Symbol        | Name                                                                                    | Fold Change | FDR      |
|--------------------|--------------------|---------------|-----------------------------------------------------------------------------------------|-------------|----------|
| 71904              | 164091             | Paqr7         | progesterin and adipoQ receptor family member VII                                       | 0.84        | 7.28E-02 |
| 71970              | 114821             | Scand3        | SCAN domain containing 3                                                                | 0.7         | 7.65E-02 |
| 72003              | 132204             | Synpr         | synaptoporin                                                                            | 1.16        | 5.88E-02 |
| 72050              | 79070              | Kdelc1        | KDEL (Lys-Asp-Glu-Leu) containing 1                                                     | 0.83        | 6.56E-02 |
| 72102              | 8446               | Dusp11        | dual specificity phosphatase 11 (RNA/RNP complex 1-interacting)                         | 1.29        | 4.76E-02 |
| 72117              | 80218              | Nat13         | N-acetyltransferase 13                                                                  | 1.1         | 6.71E-02 |
| 72293              | 85409              | Nkd2          | naked cuticle 2 homolog (Drosophila)                                                    | 0.59        | 2.74E-02 |
| 72371              | 285600             | 2210408I21Rik | RIKEN cDNA 2210408I21 gene                                                              | 0.71        | 3.34E-02 |
| 72514              | 143282             | Fgfbp3        | fibroblast growth factor binding protein 3                                              | 1.38        | 5.21E-02 |
| 72544              | 118460             | Exosc6        | exosome component 6                                                                     | 0.71        | 8.63E-02 |
| 72555              | 729993             | 2700045P11Rik | RIKEN cDNA 2700045P11 gene                                                              | 1.27        | 7.00E-02 |
| 72587              | 255967             | Pan3          | PAN3 polyA specific ribonuclease subunit homolog (S. cerevisiae)                        | 1.2         | 1.51E-02 |
| 72655              |                    | 2810026P18Rik | RIKEN cDNA 2810026P18 gene                                                              | 1.34        | 1.51E-02 |
| 72656              | 55656              | Ints8         | integrator complex subunit 8                                                            | 0.84        | 7.82E-02 |
| 72658              |                    | 2700097O09Rik | RIKEN cDNA 2700097O09 gene                                                              | 0.7         | 1.52E-02 |
| 72720              | 57209              | Zfp248        | zinc finger protein 248                                                                 | 0.75        | 4.63E-02 |
| 72736              | 81542              | Tmx1          | thioredoxin-related transmembrane protein 1                                             | 1.11        | 7.92E-02 |
| 72745              | 153396             | Tmem161b      | transmembrane protein 161B                                                              | 1.36        | 2.77E-02 |
| 72748              | 81932              | Hdhd3         | haloacid dehalogenase-like hydrolase domain containing 3                                | 0.74        | 2.69E-02 |
| 72750              | 150864             | Fam117b       | family with sequence similarity 117, member B                                           | 1.12        | 3.48E-02 |
| 72754              | 55160              | Arhgef10l     | Rho guanine nucleotide exchange factor (GEF) 10-like                                    | 1.32        | 8.45E-02 |
| 72807              |                    | Zfp429        | zinc finger protein 429                                                                 | 0.68        | 6.59E-02 |
| 72826              | 143684             | Fam76b        | family with sequence similarity 76, member B                                            | 1.21        | 4.52E-02 |
| 72832              | 55118              | Crtac1        | cartilage acidic protein 1                                                              | 0.77        | 9.27E-02 |
| 72902              | 50859              | Spock3        | sparc/osteonectin, cwcv and kazal-like domains proteoglycan 3                           | 1.22        | 4.33E-02 |
| 73010              | 2845               | Gpr22         | G protein-coupled receptor 22                                                           | 1.21        | 5.77E-02 |
| 73132              | 8034               | Slc25a16      | solute carrier family 25 (mitochondrial carrier, Graves disease autoantigen), member 16 | 1.21        | 4.80E-02 |
| 73420              | 126731             | 1700054N08Rik | RIKEN cDNA 1700054N08 gene                                                              | 1.22        | 3.72E-02 |
| 73516              |                    | 1700086O06Rik | RIKEN cDNA 1700086O06 gene                                                              | 1.39        | 4.33E-02 |
| 73533              |                    | 1700080G18Rik | RIKEN cDNA 1700080G18 gene                                                              | 1.85        | 4.49E-02 |
| 73681              | 60487              | Trmt11        | tRNA methyltransferase 11 homolog (S. cerevisiae)                                       | 1.21        | 7.15E-02 |
| 73694              | 55471              | 2410091C18Rik | RIKEN cDNA 2410091C18 gene                                                              | 0.84        | 1.51E-02 |
| 73822              | 126321             | F630110N24Rik | RIKEN cDNA F630110N24 gene                                                              | 0.85        | 4.71E-02 |

| Mouse<br>Entrez ID | Human<br>Entrez ID | Symbol        | Name                                                                  | Fold Change | FDR      |
|--------------------|--------------------|---------------|-----------------------------------------------------------------------|-------------|----------|
| 73847              | 83541              | Fam110a       | family with sequence similarity 110, member A                         | 0.72        | 4.32E-02 |
| 74053              | 23426              | Grip1         | glutamate receptor interacting protein 1                              | 0.82        | 9.74E-02 |
| 74117              | 10096              | Actr3         | ARP3 actin-related protein 3 homolog (yeast)                          | 1.13        | 2.44E-02 |
| 74159              | 91452              | Acbd5         | acyl-Coenzyme A binding domain containing 5                           | 1.21        | 8.97E-02 |
| 74203              | 56478              | Eif4enif1     | eukaryotic translation initiation factor 4E nuclear import factor 1   | 1.17        | 7.33E-02 |
| 74237              | 10844              | Tubgcp2       | tubulin, gamma complex associated protein 2                           | 1.21        | 7.12E-02 |
| 74349              | 84067              | Fam160a2      | family with sequence similarity 160, member A2                        | 1.21        | 5.41E-02 |
| 74530              |                    | 9030612E09Rik | RIKEN cDNA 9030612E09 gene                                            | 1.31        | 9.38E-02 |
| 74551              | 5106               | Pck2          | phosphoenolpyruvate carboxykinase 2 (mitochondrial)                   | 0.76        | 1.92E-02 |
| 74646              | 80176              | Spsb1         | spla/ryanodine receptor domain and SOCS box containing 1              | 1.44        | 1.95E-02 |
| 74840              | 7873               | Manf          | mesencephalic astrocyte-derived neurotrophic factor                   | 0.71        | 8.46E-03 |
| 75180              | 100129924          | 4930538K18Rik | RIKEN cDNA 4930538K18 gene                                            | 1.7         | 3.55E-02 |
| 75202              |                    | 4930546H06Rik | RIKEN cDNA 4930546H06 gene                                            | 1.8         | 8.46E-03 |
| 75339              | 54737              | Mphosph8      | M-phase phosphoprotein 8                                              | 0.87        | 9.48E-02 |
| 75552              | 344838             | Paqr9         | progesterin and adipoQ receptor family member IX                      | 0.78        | 1.00E-02 |
| 75553              | 79882              | Zc3h14        | zinc finger CCCH type containing 14                                   | 1.14        | 2.57E-02 |
| 75572              | 98                 | Acyp2         | acylphosphatase 2, muscle type                                        | 0.9         | 5.62E-02 |
| 75597              | 91942              | Ndufaf2       | NADH dehydrogenase (ubiquinone) 1 alpha subcomplex, assembly factor 2 | 0.84        | 5.34E-02 |
| 75712              | 28978              | Tmem14a       | transmembrane protein 14A                                             | 1.19        | 8.84E-02 |
| 75735              | 53354              | Pank1         | pantothenate kinase 1                                                 | 0.79        | 4.49E-02 |
| 76000              |                    | 5033430I15Rik | RIKEN cDNA 5033430I15 gene                                            | 1.53        | 6.33E-02 |
| 76222              | 64110              | Magef1        | melanoma antigen family F, 1                                          | 1.46        | 8.45E-02 |
| 76294              | 140458             | Asb5          | ankyrin repeat and SOCs box-containing 5                              | 1.71        | 1.94E-02 |
| 76355              | 23483              | Tgds          | TDP-glucose 4,6-dehydratase                                           | 0.74        | 5.39E-02 |
| 76366              | 219402             | Mtif3         | mitochondrial translational initiation factor 3                       | 0.82        | 8.94E-02 |
| 76375              | 55070              | Det1          | de-etiolated homolog 1 (Arabidopsis)                                  | 0.71        | 9.48E-02 |
| 76429              | 64077              | 2310007H09Rik | RIKEN cDNA 2310007H09 gene                                            | 0.74        | 9.86E-02 |
| 76500              | 51447              | Ip6k2         | inositol hexaphosphate kinase 2                                       | 1.18        | 3.40E-02 |
| 76539              | 63877              | D19Ertd737e   | DNA segment, Chr 19, ERATO Doi 737, expressed                         | 1.39        | 3.96E-02 |
| 76737              | 79174              | Creld2        | cysteine-rich with EGF-like domains 2                                 | 0.6         | 9.42E-03 |
| 76757              | 10345              | Trdn          | triadin                                                               | 1.91        | 4.78E-02 |
| 76781              | 64863              | Mettl4        | methyltransferase like 4                                              | 0.71        | 3.08E-02 |
| 76789              | 440145             | 2410129H14Rik | RIKEN cDNA 2410129H14 gene                                            | 1.12        | 8.31E-02 |
| 76792              | 79794              | 2410131K14Rik | RIKEN cDNA 2410131K14 gene                                            | 0.86        | 9.43E-02 |



| Mouse<br>Entrez ID | Human<br>Entrez ID | Symbol        | Name                                                                                      | Fold Change | FDR      |
|--------------------|--------------------|---------------|-------------------------------------------------------------------------------------------|-------------|----------|
| 76880              |                    | 6430411K18Rik | RIKEN cDNA 6430411K18 gene                                                                | 0.48        | 2.01E-02 |
| 76894              | 196074             | Mett5d1       | methyltransferase 5 domain containing 1                                                   | 1.22        | 3.68E-02 |
| 76964              | 54058              | 2610028H24Rik | RIKEN cDNA 2610028H24 gene                                                                | 0.74        | 7.07E-02 |
| 77006              | 65992              | Ddrgk1        | DDRGK domain containing 1                                                                 | 1.14        | 7.86E-02 |
| 77043              |                    | 4632433K11Rik | RIKEN cDNA 4632433K11 gene                                                                | 1.4         | 1.51E-02 |
| 77090              | 79629              | Ocell1        | occludin/ELL domain containing 1                                                          | 0.81        | 9.70E-02 |
| 77134              | 10949              | Hnrnpa0       | heterogeneous nuclear ribonucleoprotein A0                                                | 1.08        | 3.72E-02 |
| 77371              | 10802              | Sec24a        | Sec24 related gene family, member A ( <i>S. cerevisiae</i> )                              | 1.3         | 3.09E-02 |
| 77462              | 89894              | Tmem116       | transmembrane protein 116                                                                 | 1.36        | 6.14E-02 |
| 77533              |                    | C030034I22Rik | RIKEN cDNA C030034I22 gene                                                                | 1.4         | 5.39E-02 |
| 77629              | 80309              | Sphkap        | SPHK1 interactor, AKAP domain containing                                                  | 1.14        | 8.69E-02 |
| 77974              | 145226             | Rdh12         | retinol dehydrogenase 12                                                                  | 0.69        | 2.12E-02 |
| 77975              | 757                | Tmem50b       | transmembrane protein 50B                                                                 | 0.86        | 1.34E-02 |
| 78830              | 8604               | Slc25a12      | solute carrier family 25 (mitochondrial carrier, Aralar), member 12                       | 1.13        | 6.32E-02 |
| 78889              | 26118              | Wsb1          | WD repeat and SOCS box-containing 1                                                       | 1.29        | 1.51E-02 |
| 78977              | 64208              | Popdc3        | popeye domain containing 3                                                                | 0.61        | 1.59E-02 |
| 80287              | 9582               | Apobec3       | apolipoprotein B mRNA editing enzyme, catalytic polypeptide 3                             | 0.68        | 3.34E-02 |
| 80294              | 23275              | Pofut2        | protein O-fucosyltransferase 2                                                            | 0.85        | 6.77E-02 |
| 80517              | 64224              | Herpud2       | HERPUD family member 2                                                                    | 1.14        | 9.64E-02 |
| 80891              |                    | Fcrls         | Fc receptor-like S, scavenger receptor                                                    | 0.63        | 3.10E-03 |
| 81500              | 64374              | Sil1          | endoplasmic reticulum chaperone SIL1 homolog ( <i>S. cerevisiae</i> )                     | 0.87        | 9.74E-02 |
| 81907              | 66000              | Tmem108       | transmembrane protein 108                                                                 | 1.38        | 3.66E-02 |
| 83485              | 51335              | Ngrn          | neugrin, neurite outgrowth associated                                                     | 0.89        | 5.88E-02 |
| 83671              | 54843              | Syt12         | synaptotagmin-like 2                                                                      | 1.34        | 4.33E-02 |
| 83673              | 23642              | Snhg1         | small nucleolar RNA host gene (non-protein coding) 1                                      | 1.29        | 2.66E-02 |
| 83767              | 8936               | Wasf1         | WASP family 1                                                                             | 1.08        | 7.15E-02 |
| 83768              | 29952              | Dpp7          | dipeptidylpeptidase 7                                                                     | 0.77        | 1.34E-02 |
| 84036              | 3780               | Kcnn1         | potassium intermediate/small conductance calcium-activated channel, subfamily N, member 1 | 0.8         | 4.33E-02 |
| 84094              | 83483              | Plvap         | plasmalemma vesicle associated protein                                                    | 1.32        | 7.28E-02 |
| 85031              | 51365              | Pla1a         | phospholipase A1 member A                                                                 | 1.49        | 7.07E-02 |
| 93687              | 1452               | Csnk1a1       | casein kinase 1, alpha 1                                                                  | 1.1         | 3.66E-02 |
| 93739              | 11345              | Gabarapl2     | gamma-aminobutyric acid (GABA) A receptor-associated protein-like 2                       | 1.11        | 5.21E-02 |
| 93790              | 81614              | Nipa2         | non imprinted in Prader-Willi/Angelman syndrome 2 homolog (human)                         | 1.18        | 4.72E-02 |

| Mouse<br>Entrez ID | Human<br>Entrez ID | Symbol        | Name                                                                                                                                  | Fold Change | FDR      |
|--------------------|--------------------|---------------|---------------------------------------------------------------------------------------------------------------------------------------|-------------|----------|
| 93834              | 57161              | Peli2         | pellino 2                                                                                                                             | 1.26        | 4.77E-02 |
| 93840              | 57216              | Vangl2        | vang-like 2 (van gogh, Drosophila)                                                                                                    | 1.54        | 8.03E-02 |
| 93878              | 56129              | Pcdhb7        | protocadherin beta 7                                                                                                                  | 1.29        | 7.58E-02 |
| 93888              | 57717              | Pcdhb17       | protocadherin beta 17                                                                                                                 | 1.22        | 7.51E-02 |
| 94045              | 5026               | P2rx5         | purinergic receptor P2X, ligand-gated ion channel, 5                                                                                  | 0.63        | 3.65E-02 |
| 94066              | 64979              | Mrpl36        | mitochondrial ribosomal protein L36                                                                                                   | 0.84        | 9.01E-02 |
| 94067              | 84545              | Mrpl43        | mitochondrial ribosomal protein L43                                                                                                   | 0.85        | 4.49E-02 |
| 94281              | 119559             | Sfxn4         | sideroflexin 4                                                                                                                        | 0.8         | 1.52E-02 |
| 97114              | 8352               | Hist2h3c2     | histone cluster 2, H3c2                                                                                                               | 0.52        | 4.71E-02 |
| 97212              | 3030               | Hadha         | hydroxyacyl-Coenzyme A dehydrogenase/3-ketoacyl-Coenzyme A thiolase/enoyl-Coenzyme A hydratase (trifunctional protein), alpha subunit | 0.81        | 4.39E-02 |
| 97387              | 29888              | Strn4         | striatin, calmodulin binding protein 4                                                                                                | 1.22        | 4.14E-02 |
| 98193              | 50717              | Dcaf8         | DDB1 and CUL4 associated factor 8                                                                                                     | 1.14        | 5.62E-02 |
| 98258              | 10190              | Txndc9        | thioredoxin domain containing 9                                                                                                       | 1.26        | 4.97E-02 |
| 98365              | 89886              | Slamf9        | SLAM family member 9                                                                                                                  | 1.79        | 4.08E-03 |
| 99311              | 149951             | Comm7         | COMM domain containing 7                                                                                                              | 0.86        | 9.74E-02 |
| 99349              | 120526             | Dnajc24       | DnaJ (Hsp40) homolog, subfamily C, member 24                                                                                          | 0.78        | 7.12E-02 |
| 99375              | 8451               | Cul4a         | cullin 4A                                                                                                                             | 1.22        | 8.51E-02 |
| 100383             | 55108              | Bsdc1         | BSD domain containing 1                                                                                                               | 1.19        | 5.74E-02 |
| 100710             | 23047              | Pds5b         | PDS5, regulator of cohesion maintenance, homolog B ( <i>S. cerevisiae</i> )                                                           | 1.23        | 9.97E-02 |
| 101694             |                    | AI854517      | expressed sequence AI854517                                                                                                           | 1.51        | 2.24E-02 |
| 101966             | 28974              | D8Ert738e     | DNA segment, Chr 8, ERATO Doi 738, expressed                                                                                          | 0.84        | 8.56E-02 |
| 102334             | 55608              | Ankrd10       | ankyrin repeat domain 10                                                                                                              | 1.17        | 7.07E-02 |
| 102595             | 80301              | Plekho2       | pleckstrin homology domain containing, family O member 2                                                                              | 0.81        | 8.03E-02 |
| 102954             | 170685             | Nudt10        | nudix (nucleoside diphosphate linked moiety X)-type motif 10                                                                          | 1.12        | 8.69E-02 |
| 103098             | 55117              | Slc6a15       | solute carrier family 6 (neurotransmitter transporter), member 15                                                                     | 1.18        | 3.09E-02 |
| 103284             | 84872              | Zc3h10        | zinc finger CCCH type containing 10                                                                                                   | 0.88        | 9.55E-02 |
| 103511             | 254228             | Fam26e        | family with sequence similarity 26, member E                                                                                          | 0.76        | 4.89E-02 |
| 103537             | 54799              | Mbt1          | mbt domain containing 1                                                                                                               | 1.26        | 7.92E-02 |
| 103742             | 84299              | 1810046J19Rik | RIKEN cDNA 1810046J19 gene                                                                                                            | 0.9         | 5.30E-02 |
| 104027             | 11346              | Synpo         | synaptopodin                                                                                                                          | 0.73        | 8.94E-02 |
| 104252             | 10435              | Cdc42ep2      | CDC42 effector protein (Rho GTPase binding) 2                                                                                         | 0.66        | 5.62E-02 |
| 104479             | 150275             | Ccdc117       | coiled-coil domain containing 117                                                                                                     | 0.79        | 7.75E-02 |
| 105278             | 23552              | Ccrk          | cell cycle related kinase                                                                                                             | 0.6         | 3.10E-03 |

| Mouse<br>Entrez ID | Human<br>Entrez ID | Symbol        | Name                                                                                      | Fold Change | FDR      |
|--------------------|--------------------|---------------|-------------------------------------------------------------------------------------------|-------------|----------|
| 105351             | 79020              | AW209491      | expressed sequence AW209491                                                               | 0.86        | 5.62E-02 |
| 105504             | 10640              | Exoc5         | exocyst complex component 5                                                               | 1.14        | 4.45E-02 |
| 105787             | 5562               | Prkaa1        | protein kinase, AMP-activated, alpha 1 catalytic subunit                                  | 1.27        | 4.45E-02 |
| 105827             | 347902             | Amigo2        | adhesion molecule with Ig like domain 2                                                   | 0.76        | 8.44E-02 |
| 106042             | 144165             | Prickle1      | prickle like 1 (Drosophila)                                                               | 1.11        | 7.60E-02 |
| 106338             | 63899              | Nsun3         | NOL1/NOP2/Sun domain family member 3                                                      | 1.35        | 4.90E-02 |
| 107338             | 8729               | Gbf1          | golgi-specific brefeldin A-resistance factor 1                                            | 0.85        | 8.51E-02 |
| 107373             | 63901              | Fam111a       | family with sequence similarity 111, member A                                             | 0.64        | 7.29E-02 |
| 107747             | 10840              | Aldh111       | aldehyde dehydrogenase 1 family, member L1                                                | 0.76        | 5.86E-02 |
| 107770             | 53345              | Tm6sf2        | transmembrane 6 superfamily member 2                                                      | 0.56        | 2.34E-02 |
| 107869             | 1491               | Cth           | cystathionase (cystathionine gamma-lyase)                                                 | 0.53        | 8.82E-03 |
| 108067             | 8891               | Eif2b3        | eukaryotic translation initiation factor 2B, subunit 3                                    | 1.16        | 8.29E-02 |
| 108073             | 2917               | Grm7          | glutamate receptor, metabotropic 7                                                        | 1.14        | 5.21E-02 |
| 108143             | 6880               | Taf9          | TAF9 RNA polymerase II, TATA box binding protein (TBP)-associated factor                  | 0.74        | 1.08E-02 |
| 108686             | 55704              | Ccdc88a       | coiled coil domain containing 88A                                                         | 1.22        | 2.03E-02 |
| 108707             | 85395              | 1810008A18Rik | RIKEN cDNA 1810008A18 gene                                                                | 0.79        | 1.40E-02 |
| 108841             | 112724             | Rdh13         | retinol dehydrogenase 13 (all-trans and 9-cis)                                            | 0.87        | 8.91E-02 |
| 108900             | 729533             | Fam72a        | family with sequence similarity 72, member A                                              | 0.59        | 2.44E-02 |
| 109136             | 166785             | Mmaa          | methylmalonic aciduria (cobalamin deficiency) type A                                      | 0.76        | 4.97E-02 |
| 109145             | 84296              | Gins4         | GINS complex subunit 4 (Sld5 homolog)                                                     | 0.8         | 7.67E-02 |
| 109154             | 9761               | Mlec          | malectin                                                                                  | 0.8         | 2.35E-02 |
| 109305             | 84876              | Orai1         | ORAI calcium release-activated calcium modulator 1                                        | 0.81        | 9.27E-02 |
| 109552             | 6717               | Sri           | sorcin                                                                                    | 0.88        | 7.67E-02 |
| 110198             | 8574               | Akr7a5        | aldo-keto reductase family 7, member A5 (aflatoxin aldehyde reductase)                    | 0.81        | 5.28E-02 |
| 110593             | 7799               | Prdm2         | PR domain containing 2, with ZNF domain                                                   | 1.35        | 1.47E-02 |
| 110595             | 7079               | Timp4         | tissue inhibitor of metalloproteinase 4                                                   | 0.84        | 3.46E-02 |
| 110695             | 501                | Aldh7a1       | aldehyde dehydrogenase family 7, member A1                                                | 0.84        | 8.29E-02 |
| 110826             | 2109               | Etfb          | electron transferring flavoprotein, beta polypeptide                                      | 0.82        | 5.57E-02 |
| 110960             | 6897               | Tars          | threonyl-tRNA synthetase                                                                  | 0.83        | 8.50E-02 |
| 114641             | 6160               | Rpl31         | ribosomal protein L31                                                                     | 0.87        | 8.58E-02 |
| 114863             | 11212              | Prosc         | proline synthetase co-transcribed                                                         | 0.84        | 4.49E-02 |
| 121022             | 64968              | Mrps6         | mitochondrial ribosomal protein S6                                                        | 0.8         | 9.28E-02 |
| 140493             | 3782               | Kcnn3         | potassium intermediate/small conductance calcium-activated channel, subfamily N, member 3 | 0.82        | 8.05E-02 |

| Mouse<br>Entrez ID | Human<br>Entrez ID | Symbol        | Name                                                                     | Fold Change | FDR      |
|--------------------|--------------------|---------------|--------------------------------------------------------------------------|-------------|----------|
| 140781             | 4625               | Myh7          | myosin, heavy polypeptide 7, cardiac muscle, beta                        | 0.63        | 9.48E-02 |
| 170439             | 79071              | Elov16        | ELOVL family member 6, elongation of long chain fatty acids (yeast)      | 0.82        | 9.58E-02 |
| 170743             | 51284              | Tlr7          | toll-like receptor 7                                                     | 1.32        | 9.92E-02 |
| 170771             | 202559             | Khdrbs2       | KH domain containing, RNA binding, signal transduction associated 2      | 1.24        | 6.48E-02 |
| 192156             | 4597               | Mvd           | mevalonate (diphospho) decarboxylase                                     | 0.69        | 8.82E-03 |
| 192167             | 22871              | Nlgn1         | neuroligin 1                                                             | 1.13        | 5.75E-02 |
| 192185             | 65220              | Nadk          | NAD kinase                                                               | 0.89        | 7.92E-02 |
| 192196             | 51631              | Luc7l2        | LUC7-like 2 ( <i>S. cerevisiae</i> )                                     | 1.21        | 2.69E-02 |
| 192198             | 64101              | Lrrc4         | leucine rich repeat containing 4                                         | 1.16        | 8.58E-02 |
| 192662             | 396                | Arhgdia       | Rho GDP dissociation inhibitor (GDI) alpha                               | 0.9         | 6.31E-02 |
| 208228             | 126308             | Mobk12a       | MOB1, Mps One Binder kinase activator-like 2A (yeast)                    | 0.77        | 5.34E-02 |
| 208638             | 54977              | Slc25a38      | solute carrier family 25, member 38                                      | 0.78        | 2.27E-02 |
| 208659             | 54757              | Fam20a        | family with sequence similarity 20, member A                             | 0.8         | 9.77E-02 |
| 208727             | 9759               | Hdac4         | histone deacetylase 4                                                    | 0.77        | 5.10E-02 |
| 208748             | 79057              | Prrg3         | proline rich Gla (G-carboxyglutamic acid) 3 (transmembrane)              | 0.8         | 5.39E-02 |
| 209462             | 57531              | Hace1         | HECT domain and ankyrin repeat containing, E3 ubiquitin protein ligase 1 | 1.27        | 8.82E-03 |
| 210108             | 9856               | D130043K22Rik | RIKEN cDNA D130043K22 gene                                               | 0.79        | 5.34E-02 |
| 210719             | 283078             | Mkx           | mohawk homeobox                                                          | 1.67        | 8.46E-03 |
| 210766             | 79184              | Brcc3         | BRCA1/BRCA2-containing complex, subunit 3                                | 1.21        | 4.32E-02 |
| 211652             | 23286              | Wwc1          | WW, C2 and coiled-coil domain containing 1                               | 0.84        | 3.09E-02 |
| 212123             | 90379              | Dcaf15        | DDB1 and CUL4 associated factor 15                                       | 1.15        | 9.38E-02 |
| 212647             | 8659               | Aldh4a1       | aldehyde dehydrogenase 4 family, member A1                               | 0.84        | 6.98E-02 |
| 212919             | 154881             | Kctd7         | potassium channel tetramerisation domain containing 7                    | 0.83        | 3.09E-02 |
| 213084             | 51265              | Cdk13         | cyclin-dependent kinase-like 3                                           | 1.37        | 7.67E-02 |
| 213393             | 11067              | 8430408G22Rik | RIKEN cDNA 8430408G22 gene                                               | 0.71        | 8.51E-02 |
| 213827             | 372                | Arcn1         | archain 1                                                                | 1.15        | 1.55E-02 |
| 213895             | 9790               | Bms1          | BMS1 homolog, ribosome assembly protein (yeast)                          | 0.81        | 6.31E-02 |
| 214791             | 56256              | Sertad4       | SERTA domain containing 4                                                | 1.49        | 9.17E-02 |
| 214895             | 81562              | Lman2l        | lectin, mannose-binding 2-like                                           | 0.74        | 9.42E-03 |
| 214899             | 5927               | Kdm5a         | lysine (K)-specific demethylase 5A                                       | 0.87        | 7.92E-02 |
| 215615             | 6051               | Rnpep         | arginyl aminopeptidase (aminopeptidase B)                                | 0.8         | 3.57E-02 |
| 215821             | 57221              | D10Bwg1379e   | DNA segment, Chr 10, Brigham & Women's Genetics 1379 expressed           | 1.34        | 1.59E-02 |
| 216080             | 7321               | Ube2d1        | ubiquitin-conjugating enzyme E2D 1, UBC4/5 homolog (yeast)               | 1.2         | 6.48E-02 |
| 216177             |                    | AU041133      | expressed sequence AU041133                                              | 0.71        | 8.71E-02 |

| Mouse<br>Entrez ID | Human<br>Entrez ID | Symbol        | Name                                                                           | Fold Change | FDR      |
|--------------------|--------------------|---------------|--------------------------------------------------------------------------------|-------------|----------|
| 216443             | 4141               | Mars          | methionine-tRNA synthetase                                                     | 0.88        | 3.65E-02 |
| 216881             | 23302              | Wscd1         | WSC domain containing 1                                                        | 0.86        | 9.48E-02 |
| 217031             | 6871               | Tada2l        | transcriptional adaptor 2 (ADA2 homolog, yeast)-like                           | 1.12        | 9.79E-02 |
| 217371             | 10966              | Rab40b        | Rab40b, member RAS oncogene family                                             | 1.36        | 5.77E-02 |
| 217517             | 29091              | Stxbp6        | syntaxin binding protein 6 (amisyn)                                            | 1.28        | 3.09E-02 |
| 218503             | 115548             | Fcho2         | FCH domain only 2                                                              | 1.19        | 4.86E-02 |
| 218793             | 7325               | Ube2e2        | ubiquitin-conjugating enzyme E2E 2 (UBC4/5 homolog, yeast)                     | 1.12        | 2.12E-02 |
| 218811             | 9632               | Sec24c        | Sec24 related gene family, member C (S. cerevisiae)                            | 0.85        | 1.51E-02 |
| 223601             | 51571              | Fam49b        | family with sequence similarity 49, member B                                   | 1.21        | 3.21E-02 |
| 223696             | 56993              | Tomm22        | translocase of outer mitochondrial membrane 22 homolog (yeast)                 | 1.19        | 3.45E-02 |
| 223978             | 55313              | Cpped1        | Vcalcineurin-like phosphoesterase domain containing 1                          | 1.12        | 6.48E-02 |
| 224022             | 6545               | Slc7a4        | solute carrier family 7 (cationic amino acid transporter, y+ system), member 4 | 0.81        | 4.52E-02 |
| 224111             | 26043              | Ubxn7         | UBX domain protein 7                                                           | 0.8         | 2.69E-02 |
| 224171             | 57650              | C330027C09Rik | RIKEN cDNA C330027C09 gene                                                     | 1.32        | 4.48E-02 |
| 224481             | 51106              | Tfb1m         | transcription factor B1, mitochondrial                                         | 1.29        | 4.85E-02 |
| 224648             | 54887              | Uhrf1bp1      | UHRF1 (ICBP90) binding protein 1                                               | 0.86        | 7.44E-02 |
| 224694             | 55552              | Zfp81         | zinc finger protein 81                                                         | 1.78        | 6.08E-03 |
| 224823             | 88745              | BC011248      | cDNA sequence BC011248                                                         | 0.84        | 7.12E-02 |
| 225055             | 80204              | Fbxo11        | F-box protein 11                                                               | 1.17        | 2.66E-02 |
| 225887             | 4728               | Ndufs8        | NADH dehydrogenase (ubiquinone) Fe-S protein 8                                 | 0.95        | 8.69E-02 |
| 226153             | 56652              | Peo1          | progressive external ophthalmoplegia 1 (human)                                 | 0.81        | 3.09E-02 |
| 226182             | 6877               | Taf5          | TAF5 RNA polymerase II, TATA box binding protein (TBP)-associated factor       | 0.76        | 4.49E-02 |
| 226610             | 149297             | Fam78b        | family with sequence similarity 78, member B                                   | 0.78        | 9.28E-02 |
| 226654             | 100131187          | Gm4848        | predicted gene 4848                                                            | 0.44        | 5.36E-03 |
| 226823             | 51133              | Kctd3         | potassium channel tetramerisation domain containing 3                          | 1.18        | 3.97E-02 |
| 226976             | 55683              | 4632411B12Rik | RIKEN cDNA 4632411B12 gene                                                     | 0.84        | 6.72E-02 |
| 227399             | 23262              | Hisppd1       | histidine acid phosphatase domain containing 1                                 | 1.23        | 5.38E-02 |
| 227683             | 51117              | Coq4          | coenzyme Q4 homolog (yeast)                                                    | 0.8         | 5.77E-02 |
| 227738             | 90678              | Lrsam1        | leucine rich repeat and sterile alpha motif containing 1                       | 0.81        | 8.80E-02 |
| 227835             | 79712              | Gtdc1         | glycosyltransferase-like domain containing 1                                   | 1.14        | 4.48E-02 |
| 227867             | 26122              | Epc2          | enhancer of polycomb homolog 2 (Drosophila)                                    | 1.18        | 2.03E-02 |
| 228858             | 78997              | Gdap1l1       | ganglioside-induced differentiation-associated protein 1-like 1                | 0.77        | 1.94E-02 |
| 229007             | 84619              | Zgpat         | zinc finger, CCCH-type with G patch domain                                     | 0.81        | 6.73E-02 |
| 229599             | 148523             | Gm129         | predicted gene 129                                                             | 1.48        | 7.07E-02 |

| Mouse<br>Entrez ID | Human<br>Entrez ID | Symbol     | Name                                                                         | Fold Change | FDR      |
|--------------------|--------------------|------------|------------------------------------------------------------------------------|-------------|----------|
| 229675             | 54665              | Rsbn1      | rosbin, round spermatid basic protein 1                                      | 1.16        | 9.29E-02 |
| 229791             | 9890               | D3Bwg0562e | DNA segment, Chr 3, Brigham & Women's Genetics 0562 expressed                | 1.14        | 3.09E-02 |
| 230119             | 9925               | Zbtb5      | zinc finger and BTB domain containing 5                                      | 0.77        | 5.21E-02 |
| 230157             | 8577               | Tmeff1     | transmembrane protein with EGF-like and two follistatin-like domains 1       | 1.13        | 1.59E-02 |
| 230598             | 4898               | Nrd1       | nardilysin, N-arginine dibasic convertase, NRD convertase 1                  | 0.88        | 4.72E-02 |
| 230696             | 79078              | AU022252   | expressed sequence AU022252                                                  | 0.61        | 1.00E-02 |
| 230734             | 79693              | Yrdc       | yrnC domain containing (E.coli)                                              | 1.23        | 9.17E-02 |
| 230779             | 347735             | Serinc2    | serine incorporator 2                                                        | 0.75        | 6.69E-02 |
| 230848             | 9923               | Zbtb40     | zinc finger and BTB domain containing 40                                     | 0.68        | 6.57E-02 |
| 230936             | 148479             | Phf13      | PHD finger protein 13                                                        | 0.84        | 5.90E-02 |
| 231225             | 202018             | Tapt1      | transmembrane anterior posterior transformation 1                            | 1.14        | 7.67E-02 |
| 231279             | 60558              | Guf1       | GUF1 GTPase homolog (S. cerevisiae)                                          | 1.27        | 9.48E-02 |
| 231858             | 55698              | Radil      | Ras association and DIL domains                                              | 0.74        | 7.71E-02 |
| 231871             | 221955             | Daglb      | diacylglycerol lipase, beta                                                  | 1.19        | 5.71E-02 |
| 232232             | 79885              | Hdac11     | histone deacetylase 11                                                       | 0.88        | 7.67E-02 |
| 232288             | 23150              | Frmd4b     | FERM domain containing 4B                                                    | 1.33        | 7.07E-02 |
| 232536             | 60488              | Mrps35     | mitochondrial ribosomal protein S35                                          | 0.84        | 9.05E-02 |
| 232816             | 89887              | Zfp628     | zinc finger protein 628                                                      | 1.48        | 1.59E-02 |
| 232854             | 147686             | Zfp418     | zinc finger protein 418                                                      | 0.59        | 1.95E-02 |
| 232878             | 342945             | Zscan22    | zinc finger and SCAN domain containing 22                                    | 0.59        | 3.07E-02 |
| 232943             | 147700             | Klc3       | kinesin light chain 3                                                        | 1.22        | 8.51E-02 |
| 232946             | 388552             | Bloc1s3    | biogenesis of lysosome-related organelles complex-1, subunit 3               | 0.85        | 7.44E-02 |
| 233056             | 388536             | Zfp790     | zinc finger protein 790                                                      | 0.7         | 7.07E-02 |
| 233271             | 338645             | Luzp2      | leucine zipper protein 2                                                     | 1.23        | 8.91E-02 |
| 233805             | 123879             | Dcun1d3    | DCN1, defective in cullin neddylation 1, domain containing 3 (S. cerevisiae) | 0.81        | 5.43E-02 |
| 233908             | 2521               | Fus        | fusion, derived from t(12;16) malignant liposarcoma (human)                  | 1.12        | 2.14E-02 |
| 233913             | 64755              | BC017158   | cDNA sequence BC017158                                                       | 0.84        | 8.90E-02 |
| 234214             | 8470               | Sorbs2     | sorbin and SH3 domain containing 2                                           | 1.17        | 7.92E-02 |
| 234356             | 55790              | Csgalnact1 | chondroitin sulfate N-acetylgalactosaminyltransferase 1                      | 1.37        | 3.08E-02 |
| 235040             | 84971              | Atg4d      | autophagy-related 4D (yeast)                                                 | 0.88        | 7.92E-02 |
| 235072             | 989                | 7-Sep      | septin 7                                                                     | 1.17        | 6.04E-02 |
| 235344             | 23235              | Sik2       | salt inducible kinase 2                                                      | 0.76        | 6.87E-02 |
| 235380             | 23312              | Dmx12      | Dmx-like 2                                                                   | 1.09        | 9.42E-02 |
| 235441             | 9960               | Usp3       | ubiquitin specific peptidase 3                                               | 1.29        | 4.44E-02 |

| Mouse<br>Entrez ID | Human<br>Entrez ID | Symbol        | Name                                                           | Fold Change | FDR      |
|--------------------|--------------------|---------------|----------------------------------------------------------------|-------------|----------|
| 235459             | 2958               | Gtf2a2        | general transcription factor II A, 2                           | 1.16        | 1.62E-02 |
| 237082             | 55916              | Nxt2          | nuclear transport factor 2-like export factor 2                | 1.17        | 7.71E-02 |
| 237353             | 344558             | Sh3rf3        | SH3 domain containing ring finger 3                            | 0.82        | 5.88E-02 |
| 237761             | 134548             | Ankrd43       | ankyrin repeat domain 43                                       | 1.16        | 8.22E-02 |
| 238037             | 80304              | BC068281      | cDNA sequence BC068281                                         | 0.77        | 5.92E-02 |
| 238266             | 83851              | Syt16         | synaptotagmin XVI                                              | 1.3         | 1.09E-02 |
| 240255             | 64848              | Ythdc2        | YTH domain containing 2                                        | 1.25        | 3.84E-02 |
| 240832             | 163590             | Tor1aip2      | torsin A interacting protein 2                                 | 1.25        | 8.15E-02 |
| 241070             | 2825               | Gpr1          | G protein-coupled receptor 1                                   | 0.6         | 4.44E-02 |
| 242384             | 158038             | Lingo2        | leucine rich repeat and Ig domain containing 2                 | 1.29        | 9.48E-02 |
| 242418             | 79269              | Dcaf10        | DDB1 and CUL4 associated factor 10                             | 1.29        | 3.72E-02 |
| 243385             | 285513             | Gprin3        | GPRIN family member 3                                          | 0.76        | 7.23E-02 |
| 243653             | 51267              | Clec1a        | C-type lectin domain family 1, member a                        | 1.71        | 4.86E-02 |
| 243833             | 7554               | Zfp128        | zinc finger protein 128                                        | 0.75        | 9.82E-02 |
| 244867             | 57569              | Arhgap20      | Rho GTPase activating protein 20                               | 1.3         | 7.79E-02 |
| 245944             | 51542              | Vps54         | vacuolar protein sorting 54 (yeast)                            | 1.16        | 4.80E-02 |
| 246313             | 128674             | Prokr2        | prokineticin receptor 2                                        | 0.71        | 5.70E-02 |
| 246738             | 54943              | Dnajc28       | DnaJ (Hsp40) homolog, subfamily C, member 28                   | 0.65        | 1.93E-02 |
| 267019             | 6210               | Rps15a        | ribosomal protein S15A                                         | 1.19        | 3.97E-02 |
| 268354             | 338811             | Fam19a2       | family with sequence similarity 19, member A2                  | 1.18        | 2.76E-02 |
| 268390             | 130872             | Ahsa2         | AHA1, activator of heat shock protein ATPase homolog 2 (yeast) | 0.82        | 3.08E-02 |
| 268482             | 3859               | Krt12         | keratin 12                                                     | 1.72        | 8.99E-02 |
| 268706             | 153129             | Slc38a9       | solute carrier family 38, member 9                             | 0.83        | 4.49E-02 |
| 268932             | 57524              | Caskin1       | CASK interacting protein 1                                     | 0.84        | 4.50E-02 |
| 269113             | 53371              | Nup54         | nucleoporin 54                                                 | 0.84        | 7.82E-02 |
| 269252             | 9329               | Gtf3c4        | general transcription factor IIIC, polypeptide 4               | 0.74        | 5.54E-02 |
| 269344             | 80237              | Ell3          | elongation factor RNA polymerase II-like 3                     | 0.84        | 6.39E-02 |
| 269423             | 80167              | 3110057O12Rik | RIKEN cDNA 3110057O12 gene                                     | 0.75        | 5.57E-02 |
| 269623             | 84060              | C030048B08Rik | RIKEN cDNA C030048B08 gene                                     | 1.22        | 6.73E-02 |
| 269630             |                    | BC050254      | cDNA sequence BC050254                                         | 1.32        | 2.66E-02 |
| 270156             | 55216              | AU019823      | expressed sequence AU019823                                    | 1.27        | 5.14E-02 |
| 270160             | 54734              | Rab39         | RAB39, member RAS oncogene family                              | 0.55        | 1.94E-02 |
| 271305             | 112885             | Phf21b        | PHD finger protein 21B                                         | 1.44        | 3.72E-02 |
| 271786             | 114805             | Galnt13       | UDP-N-acetyl-alpha-D-galactosamine:polypeptide N-              | 1.46        | 1.47E-02 |

| Mouse<br>Entrez ID | Human<br>Entrez ID | Symbol        | Name                                                                            | Fold Change | FDR      |
|--------------------|--------------------|---------------|---------------------------------------------------------------------------------|-------------|----------|
|                    |                    |               | acetylgalactosaminyltransferase 13                                              |             |          |
| 271970             | 79642              | Arsj          | arylsulfatase J                                                                 | 1.6         | 5.62E-02 |
| 272009             | 135295             | RP23-12I24.6  | serine-arginine repressor protein                                               | 1.25        | 6.12E-02 |
| 277396             | 151230             | Klhl23        | kelch-like 23 (Drosophila)                                                      | 1.1         | 8.44E-02 |
| 282619             | 374897             | Sbsn          | suprabasin                                                                      | 1.23        | 3.09E-02 |
| 319162             | 92815              | Hist3h2a      | histone cluster 3, H2a                                                          | 0.83        | 7.92E-02 |
| 320011             | 56886              | Uggt1         | UDP-glucose glycoprotein glucosyltransferase 1                                  | 0.8         | 5.59E-02 |
| 320267             | 8939               | Fubp3         | far upstream element (FUSE) binding protein 3                                   | 1.17        | 4.49E-02 |
| 320376             | 63035              | Bcor1l        | BCL6 co-repressor-like 1                                                        | 0.82        | 7.72E-02 |
| 320473             | 54497              | Heatr5b       | HEAT repeat containing 5B                                                       | 0.8         | 4.49E-02 |
| 320593             |                    | A230051N06Rik | RIKEN cDNA A230051N06 gene                                                      | 1.32        | 2.03E-02 |
| 320661             | 9778               | D5Erd579e     | DNA segment, Chr 5, ERATO Doi 579, expressed                                    | 1.07        | 9.63E-02 |
| 320709             | 84216              | Tmem117       | transmembrane protein 117                                                       | 1.38        | 3.09E-02 |
| 320713             | 114803             | Mysm1         | myb-like, SWIRM and MPN domains 1                                               | 1.38        | 2.14E-02 |
| 321007             | 84947              | Serac1        | serine active site containing 1                                                 | 0.8         | 3.14E-02 |
|                    |                    |               | protein tyrosine phosphatase, receptor type, f polypeptide (PTPRF), interacting |             |          |
| 327814             | 8499               | Ppfia2        | protein (liprin), alpha 2                                                       | 1.17        | 9.74E-02 |
| 327826             | 10818              | Frs2          | fibroblast growth factor receptor substrate 2                                   | 1.21        | 1.51E-02 |
| 328099             |                    | Gm5081        | predicted gene 5081                                                             | 0.82        | 5.38E-02 |
| 328309             |                    | Gm9776        | predicted gene 9776                                                             | 1.44        | 3.17E-02 |
| 328971             |                    | Spink10       | serine peptidase inhibitor, Kazal type 10                                       | 0.67        | 5.34E-02 |
| 329274             | 148753             | Fam163a       | family with sequence similarity 163, member A                                   | 0.74        | 3.05E-02 |
| 329502             | 123745             | Pla2g4e       | phospholipase A2, group IVE                                                     | 2.02        | 1.40E-02 |
| 329504             | 9836               | Lcmt2         | leucine carboxyl methyltransferase 2                                            | 1.24        | 4.86E-02 |
| 329628             | 79633              | Fat4          | FAT tumor suppressor homolog 4 (Drosophila)                                     | 1.59        | 1.34E-02 |
| 329828             | 57462              | AI464131      | expressed sequence AI464131                                                     | 0.78        | 6.71E-02 |
| 330173             |                    | 2610524H06Rik | RIKEN cDNA 2610524H06 gene                                                      | 1.21        | 8.99E-02 |
| 330217             | 79690              | Gal3st4       | galactose-3-O-sulfotransferase 4                                                | 0.64        | 1.94E-02 |
| 330502             | 284406             | Zfp82         | zinc finger protein 82                                                          | 0.66        | 6.14E-02 |
| 331026             | 29925              | Gmppb         | GDP-mannose pyrophosphorylase B                                                 | 0.76        | 6.00E-02 |
| 338364             | 201292             | Trim65        | tripartite motif-containing 65                                                  | 1.39        | 9.70E-02 |
| 353242             | 219927             | Mrpl21        | mitochondrial ribosomal protein L21                                             | 0.85        | 3.68E-02 |
| 353258             | 84946              | Ltv1          | LTV1 homolog (S. cerevisiae)                                                    | 0.83        | 6.86E-02 |
| 353282             | 57713              | Sfmbt2        | Scm-like with four mbt domains 2                                                | 0.63        | 4.92E-02 |



| Mouse<br>Entrez ID | Human<br>Entrez ID | Symbol        | Name                                                                | Fold Change | FDR      |
|--------------------|--------------------|---------------|---------------------------------------------------------------------|-------------|----------|
| 378462             | 378464             | Morn2         | MORN repeat containing 2                                            | 0.81        | 5.86E-02 |
| 378702             | 10169              | Serf2         | small EDRK-rich factor 2                                            | 0.83        | 5.30E-02 |
| 378937             | 441381             | Lrrc24        | leucine rich repeat containing 24                                   | 0.79        | 4.49E-02 |
| 380664             | 23592              | Lemd3         | LEM domain containing 3                                             | 1.15        | 8.07E-02 |
| 380753             | 222255             | Atxn711       | ataxin 7-like 1                                                     | 1.66        | 2.03E-02 |
| 380928             | 4008               | Lmo7          | LIM domain only 7                                                   | 1.31        | 1.94E-02 |
| 381633             | 401115             | Gm1673        | predicted gene 1673                                                 | 0.85        | 3.97E-02 |
| 382038             | 9816               | Urb2          | URB2 ribosome biogenesis 2 homolog (S. cerevisiae)                  | 0.8         | 5.62E-02 |
| 382089             | 134701             | Ripply2       | rippy2 homolog (zebrafish)                                          | 1.57        | 2.34E-02 |
| 386753             | 400624             | Dbpht2        | DNA binding protein with his-thr domain                             | 1.48        | 1.47E-02 |
| 394431             | 7361               | Ugt1a@        | UDP glycosyltransferase 1 family, polypeptide A cluster             | 1.53        | 8.60E-02 |
| 407821             | 84133              | Znrf3         | zinc and ring finger 3                                              | 1.3         | 4.49E-02 |
| 415115             | 140825             | Neurl2        | neuralized-like 2 (Drosophila)                                      | 1.29        | 8.45E-02 |
| 432450             | 154215             | Nkain2        | Na <sup>+</sup> /K <sup>+</sup> transporting ATPase interacting 2   | 1.19        | 3.09E-02 |
| 434778             | 347475             | 6330534C20Rik | RIKEN cDNA 6330534C20 gene                                          | 0.58        | 8.46E-03 |
| 449521             | 7760               | Zfp213        | zinc finger protein 213                                             | 0.8         | 4.80E-02 |
| 474156             | 221504             | Zbtb9         | zinc finger and BTB domain containing 9                             | 0.73        | 4.08E-02 |
| 574402             | 2840               | Gpr17         | G protein-coupled receptor 17                                       | 0.67        | 6.73E-02 |
| 622208             |                    | Gm6297        | predicted gene 6297                                                 | 1.77        | 4.15E-02 |
| 622320             | 283219             | Kctd21        | potassium channel tetramerisation domain containing 21              | 0.69        | 1.94E-02 |
| 623346             | 28977              | Gm6419        | predicted gene 6419                                                 | 0.9         | 7.15E-02 |
| 624866             |                    | Gm6534        | predicted gene 6534                                                 | 0.72        | 5.59E-02 |
| 634731             | 64420              | Gm12528       | predicted gene 12528                                                | 1.59        | 3.65E-02 |
| 641376             | 84134              | Tomm40l       | translocase of outer mitochondrial membrane 40 homolog-like (yeast) | 0.85        | 5.62E-02 |
| 665193             |                    |               |                                                                     | 1.86        | 1.51E-02 |
| 665934             |                    | EG665934      | predicted gene, EG665934                                            | 1.74        | 8.82E-03 |
| 668166             | 158586             | Zxdb          | zinc finger, X-linked, duplicated B                                 | 1.32        | 1.59E-02 |
| 668212             | 22979              | Efr3b         | EFR3 homolog B (S. cerevisiae)                                      | 0.88        | 7.25E-02 |
| 100037258          | 5611               | Dnajc3        | DnaJ (Hsp40) homolog, subfamily C, member 3                         | 0.84        | 6.73E-02 |
| 100039307          |                    | Gm2149        | predicted gene 2149                                                 | 1.41        | 2.44E-02 |
| 100039495          |                    | Gm15706       | predicted gene 15706                                                | 1.49        | 1.47E-02 |
| 100040220          |                    | Gm9892        | predicted gene 9892                                                 | 1.14        | 6.56E-02 |
| 100040518          |                    |               |                                                                     | 1.85        | 6.08E-03 |
| 100041035          |                    |               |                                                                     | 1.55        | 5.77E-02 |

| Mouse     | Human     |         |                      |             |          |
|-----------|-----------|---------|----------------------|-------------|----------|
| Entrez ID | Entrez ID | Symbol  | Name                 | Fold Change | FDR      |
| 100041294 |           | Gm3258  | predicted gene 3258  | 0.88        | 9.48E-02 |
| 100042008 |           | Gm9794  | predicted gene 9794  | 1.1         | 7.82E-02 |
| 100042616 |           | Gm3932  | predicted gene 3932  | 0.76        | 4.77E-02 |
| 100043736 |           | Gm10762 | predicted gene 10762 | 1.45        | 2.27E-02 |
