# Supplementary material
Source: PubMed Central journal article supplement (PMC3391332)
Supplement: NIHMS380784-supplement-ESM_5.pdf [file NIHMS380784-supplement-ESM_5.pdf]

## 5. Complete DAVID and ConceptGen results

### 5.1. DAVID terms in up-regulated 8-week DEGs

This is the complete list of significantly enriched annotation terms from DAVID in the 8-week up-regulated DEGs.

| Category      | Term                                                    | Count | PValue   | Fold Enrichment | Benjamini |
|---------------|---------------------------------------------------------|-------|----------|-----------------|-----------|
| GOTERM_BP_FAT | GO:0009411~response to UV                               | 4     | 8.95E-04 | 20.71           | 4.63E-01  |
| GOTERM_CC_FAT | GO:0044454~nuclear chromosome part                      | 5     | 1.31E-03 | 10.29           | 1.76E-01  |
| GOTERM_CC_FAT | GO:0000228~nuclear chromosome                           | 5     | 2.37E-03 | 8.76            | 1.61E-01  |
| GOTERM_CC_FAT | GO:0044427~chromosomal part                             | 7     | 3.44E-03 | 4.67            | 1.56E-01  |
| GOTERM_CC_FAT | GO:0034702~ion channel complex                          | 5     | 6.13E-03 | 6.71            | 2.04E-01  |
| GOTERM_CC_FAT | GO:0000785~chromatin                                    | 5     | 7.13E-03 | 6.42            | 1.91E-01  |
| GOTERM_CC_FAT | GO:0005694~chromosome                                   | 7     | 7.89E-03 | 3.92            | 1.78E-01  |
| GOTERM_BP_FAT | GO:0031032~actomyosin structure organization            | 3     | 8.09E-03 | 21.74           | 9.40E-01  |
| GOTERM_BP_FAT | GO:0009416~response to light stimulus                   | 4     | 1.63E-02 | 7.39            | 9.78E-01  |
| GOTERM_BP_FAT | GO:0006974~response to DNA damage stimulus              | 6     | 2.00E-02 | 3.79            | 9.70E-01  |
| GOTERM_MF_FAT | GO:0015459~potassium channel regulator activity         | 2     | 2.42E-02 | 80.53           | 9.92E-01  |
| GOTERM_CC_FAT | GO:0043228~non-membrane-bounded organelle               | 16    | 2.60E-02 | 1.77            | 4.27E-01  |
| GOTERM_CC_FAT | GO:0043232~intracellular non-membrane-bounded organelle | 16    | 2.60E-02 | 1.77            | 4.27E-01  |
| GOTERM_MF_FAT | GO:0043167~ion binding                                  | 28    | 2.65E-02 | 1.43            | 9.27E-01  |
| GOTERM_CC_FAT | GO:0000790~nuclear chromatin                            | 3     | 2.68E-02 | 11.56           | 3.95E-01  |
| GOTERM_CC_FAT | GO:0008076~voltage-gated potassium channel complex      | 3     | 4.07E-02 | 9.21            | 4.95E-01  |
| GOTERM_CC_FAT | GO:0034705~potassium channel complex                    | 3     | 4.07E-02 | 9.21            | 4.95E-01  |
| GOTERM_BP_FAT | GO:0009314~response to radiation                        | 4     | 4.31E-02 | 5.07            | 9.98E-01  |
| GOTERM_MF_FAT | GO:0008253~5'-nucleotidase activity                     | 2     | 4.32E-02 | 44.74           | 9.43E-01  |
| KEGG_PATHWAY  | mmu04115:p53 signaling pathway                          | 3     | 4.70E-02 | 8.32            | 9.36E-01  |
| GOTERM_BP_FAT | GO:0009628~response to abiotic stimulus                 | 5     | 4.79E-02 | 3.61            | 9.97E-01  |
| GOTERM_MF_FAT | GO:0022836~gated channel activity                       | 5     | 4.86E-02 | 3.58            | 9.12E-01  |

### 5.2. DAVID terms in down-regulated 8-week DEGs

This is the complete list of significantly enriched annotation terms from DAVID in the 8-week down-regulated DEGs.

| Category      | Term                                                                  | Count | PValue   | Fold Enrichment | Benjamini |
|---------------|-----------------------------------------------------------------------|-------|----------|-----------------|-----------|
| GOTERM_MF_FAT | GO:0008270~zinc ion binding                                           | 26    | 1.08E-04 | 2.19            | 1.93E-02  |
| GOTERM_MF_FAT | GO:0046914~transition metal ion binding                               | 28    | 5.25E-04 | 1.90            | 4.64E-02  |
| GOTERM_CC_FAT | GO:0070013~intracellular organelle lumen                              | 15    | 1.07E-03 | 2.63            | 1.43E-01  |
| GOTERM_CC_FAT | GO:0043233~organelle lumen                                            | 15    | 1.10E-03 | 2.62            | 7.62E-02  |
| GOTERM_CC_FAT | GO:0031974~membrane-enclosed lumen                                    | 15    | 1.51E-03 | 2.54            | 7.00E-02  |
| GOTERM_BP_FAT | GO:0006350~transcription                                              | 19    | 5.03E-03 | 1.97            | 9.68E-01  |
| GOTERM_MF_FAT | GO:0003697~single-stranded DNA binding                                | 3     | 1.44E-02 | 16.11           | 5.84E-01  |
|               | GO:0003702~RNA polymerase II transcription factor activity            | 4     | 1.92E-02 | 6.95            | 5.84E-01  |
| GOTERM_MF_FAT | GO:0046872~metal ion binding                                          | 31    | 2.15E-02 | 1.43            | 5.44E-01  |
| GOTERM_BP_FAT | GO:0045449~regulation of transcription                                | 20    | 2.38E-02 | 1.65            | 1.00E+00  |
|               | GO:0051603~proteolysis involved in cellular protein catabolic process | 8     | 2.43E-02 | 2.75            | 9.96E-01  |
| GOTERM_BP_FAT | GO:0043169~cation binding                                             | 31    | 2.43E-02 | 1.41            | 5.23E-01  |
| GOTERM_BP_FAT | GO:0044257~cellular protein catabolic process                         | 8     | 2.49E-02 | 2.74            | 9.86E-01  |
| GOTERM_BP_FAT | GO:0051252~regulation of RNA metabolic process                        | 15    | 2.56E-02 | 1.85            | 9.71E-01  |
| GOTERM_CC_FAT | GO:0044432~endoplasmic reticulum part                                 | 5     | 2.75E-02 | 4.30            | 6.33E-01  |
| GOTERM_CC_FAT | GO:0005654~nucleoplasm                                                | 8     | 2.81E-02 | 2.65            | 5.60E-01  |
| GOTERM_MF_FAT | GO:0043167~ion binding                                                | 31    | 2.87E-02 | 1.40            | 5.29E-01  |
| GOTERM_BP_FAT | GO:0030163~protein catabolic process                                  | 8     | 2.94E-02 | 2.64            | 9.66E-01  |
|               | GO:0032731~positive regulation of interleukin-1 beta production       | 2     | 3.70E-02 | 52.46           | 9.75E-01  |
| GOTERM_BP_FAT | GO:0050718~positive regulation of interleukin-1 beta secretion        | 2     | 3.70E-02 | 52.46           | 9.75E-01  |
|               | GO:0032732~positive regulation of interleukin-1 production            | 2     | 3.70E-02 | 52.46           | 9.75E-01  |
| GOTERM_BP_FAT | GO:0050704~regulation of interleukin-1 secretion                      | 2     | 3.70E-02 | 52.46           | 9.75E-01  |
| GOTERM_BP_FAT | GO:0050706~regulation of interleukin-1 beta secretion                 | 2     | 3.70E-02 | 52.46           | 9.75E-01  |
| GOTERM_BP_FAT | GO:0050716~positive regulation of interleukin-1 secretion             | 2     | 3.70E-02 | 52.46           | 9.75E-01  |
| GOTERM_BP_FAT | GO:0044265~cellular macromolecule catabolic process                   | 8     | 4.46E-02 | 2.41            | 9.80E-01  |
| GOTERM_BP_FAT | GO:0006355~regulation of transcription, DNA-dependent                 | 14    | 4.70E-02 | 1.75            | 9.74E-01  |
| GOTERM_CC_FAT | GO:0031980~mitochondrial lumen                                        | 4     | 4.70E-02 | 4.87            | 6.85E-01  |
| GOTERM_CC_FAT | GO:0005759~mitochondrial matrix                                       | 4     | 4.70E-02 | 4.87            | 6.85E-01  |
| GOTERM_MF_FAT | GO:0008234~cysteine-type peptidase activity                           | 4     | 4.79E-02 | 4.85            | 6.70E-01  |

| Category      | Term                                                                                   | Count | PValue   | Fold Enrichment | Benjamini |
|---------------|----------------------------------------------------------------------------------------|-------|----------|-----------------|-----------|
| GOTERM_BP_FAT | GO:0006508~proteolysis                                                                 | 11    | 4.90E-02 | 1.95            | 9.67E-01  |
| GOTERM_MF_FAT | GO:0016861~intramolecular oxidoreductase activity, interconverting aldoses and ketoses | 2     | 4.90E-02 | 39.37           | 6.36E-01  |

### 5.3. DAVID terms in up-regulated 24-week DEGs

This is the complete list of significantly enriched annotation terms from DAVID in the 24-week up-regulated DEGs.

| Category      | Term                                                                  | Count | PValue   | Fold Enrichment | Benjamini |
|---------------|-----------------------------------------------------------------------|-------|----------|-----------------|-----------|
| GOTERM_BP_FAT | GO:0019941~modification-dependent protein catabolic process           | 20    | 2.08E-04 | 2.64            | 2.20E-01  |
| GOTERM_BP_FAT | GO:0043632~modification-dependent macromolecule catabolic process     | 20    | 2.08E-04 | 2.64            | 2.20E-01  |
| GOTERM_BP_FAT | GO:0044265~cellular macromolecule catabolic process                   | 22    | 2.92E-04 | 2.42            | 1.60E-01  |
| GOTERM_BP_FAT | GO:0009057~macromolecule catabolic process                            | 23    | 2.94E-04 | 2.35            | 1.10E-01  |
| GOTERM_MF_FAT | GO:0019899~enzyme binding                                             | 13    | 3.00E-04 | 3.56            | 1.07E-01  |
| GOTERM_BP_FAT | GO:0051603~proteolysis involved in cellular protein catabolic process | 20    | 3.89E-04 | 2.51            | 1.10E-01  |
| GOTERM_MF_FAT | GO:0019900~kinase binding                                             | 8     | 3.99E-04 | 5.90            | 7.26E-02  |
| GOTERM_BP_FAT | GO:0044257~cellular protein catabolic process                         | 20    | 4.17E-04 | 2.49            | 9.48E-02  |
| GOTERM_BP_FAT | GO:0030163~protein catabolic process                                  | 20    | 6.37E-04 | 2.41            | 1.19E-01  |
| GOTERM_BP_FAT | GO:0015031~protein transport                                          | 21    | 1.69E-03 | 2.16            | 2.50E-01  |
| GOTERM_BP_FAT | GO:0045184~establishment of protein localization                      | 21    | 1.85E-03 | 2.14            | 2.41E-01  |
| GOTERM_CC_FAT | GO:0043228~non-membrane-bounded organelle                             | 46    | 2.19E-03 | 1.55            | 4.37E-01  |
| GOTERM_CC_FAT | GO:0043232~intracellular non-membrane-bounded organelle               | 46    | 2.19E-03 | 1.55            | 4.37E-01  |
| GOTERM_CC_FAT | GO:0005694~chromosome                                                 | 15    | 2.20E-03 | 2.56            | 2.51E-01  |
| GOTERM_BP_FAT | GO:0022402~cell cycle process                                         | 15    | 2.25E-03 | 2.55            | 2.59E-01  |
| GOTERM_BP_FAT | GO:0006413~translational initiation                                   | 5     | 2.36E-03 | 8.81            | 2.45E-01  |
| GOTERM_BP_FAT | GO:0051276~chromosome organization                                    | 15    | 2.91E-03 | 2.49            | 2.71E-01  |
| GOTERM_MF_FAT | GO:0003743~translation initiation factor activity                     | 6     | 2.99E-03 | 6.07            | 3.14E-01  |
| GOTERM_CC_FAT | GO:0019717~synaptosome                                                | 6     | 3.47E-03 | 5.86            | 2.62E-01  |
| GOTERM_BP_FAT | GO:0000278~mitotic cell cycle                                         | 11    | 3.55E-03 | 3.02            | 2.98E-01  |
| GOTERM_BP_FAT | GO:0022403~cell cycle phase                                           | 13    | 3.70E-03 | 2.65            | 2.88E-01  |

| Category      | Term                                                                                                    | Count | PValue   | Fold Enrichment | Benjamini |
|---------------|---------------------------------------------------------------------------------------------------------|-------|----------|-----------------|-----------|
| GOTERM_BP_FAT | GO:0008104~protein localization                                                                         | 22    | 4.11E-03 | 1.96            | 2.96E-01  |
| GOTERM_MF_FAT | GO:0019901~protein kinase binding                                                                       | 6     | 5.36E-03 | 5.30            | 3.98E-01  |
| GOTERM_BP_FAT | GO:0010604~positive regulation of macromolecule metabolic process                                       | 19    | 6.37E-03 | 2.01            | 3.99E-01  |
| GOTERM_BP_FAT | GO:0006325~chromatin organization                                                                       | 12    | 7.49E-03 | 2.55            | 4.29E-01  |
| GOTERM_MF_FAT | GO:0008080~N-acetyltransferase activity                                                                 | 5     | 8.62E-03 | 6.15            | 4.80E-01  |
| GOTERM_CC_FAT | GO:0048471~perinuclear region of cytoplasm                                                              | 9     | 9.05E-03 | 3.07            | 4.49E-01  |
| GOTERM_BP_FAT | GO:0045935~positive regulation of nucleobase, nucleoside, nucleotide and nucleic acid metabolic process | 16    | 9.27E-03 | 2.10            | 4.80E-01  |
| GOTERM_BP_FAT | GO:0007049~cell cycle                                                                                   | 18    | 9.74E-03 | 1.97            | 4.78E-01  |
| GOTERM_BP_FAT | GO:0016192~vesicle-mediated transport                                                                   | 15    | 9.90E-03 | 2.15            | 4.65E-01  |
| GOTERM_CC_FAT | GO:0044427~chromosomal part                                                                             | 12    | 1.03E-02 | 2.43            | 4.20E-01  |
| GOTERM_MF_FAT | GO:0019894~kinesin binding                                                                              | 3     | 1.04E-02 | 18.80           | 4.82E-01  |
| GOTERM_MF_FAT | GO:0003723~RNA binding                                                                                  | 20    | 1.07E-02 | 1.87            | 4.40E-01  |
| GOTERM_BP_FAT | GO:0051173~positive regulation of nitrogen compound metabolic process                                   | 16    | 1.21E-02 | 2.04            | 5.15E-01  |
| GOTERM_BP_FAT | GO:0046907~intracellular transport                                                                      | 14    | 1.24E-02 | 2.17            | 5.08E-01  |
| GOTERM_CC_FAT | GO:0005624~membrane fraction                                                                            | 16    | 1.26E-02 | 2.02            | 4.26E-01  |
| GOTERM_CC_FAT | GO:0000785~chromatin                                                                                    | 8     | 1.41E-02 | 3.13            | 4.12E-01  |
| GOTERM_CC_FAT | GO:0000786~nucleosome                                                                                   | 5     | 1.53E-02 | 5.20            | 3.97E-01  |
| GOTERM_MF_FAT | GO:0000166~nucleotide binding                                                                           | 48    | 1.58E-02 | 1.38            | 5.29E-01  |
| GOTERM_BP_FAT | GO:0050804~regulation of synaptic transmission                                                          | 6     | 1.67E-02 | 4.02            | 5.99E-01  |
| GOTERM_CC_FAT | GO:0005626~insoluble fraction                                                                           | 16    | 1.68E-02 | 1.95            | 3.90E-01  |
| GOTERM_BP_FAT | GO:0006323~DNA packaging                                                                                | 6     | 1.73E-02 | 3.98            | 5.97E-01  |
| GOTERM_BP_FAT | GO:0007242~intracellular signaling cascade                                                              | 23    | 1.74E-02 | 1.68            | 5.83E-01  |
| GOTERM_MF_FAT | GO:0016407~acetyltransferase activity                                                                   | 5     | 1.78E-02 | 4.97            | 5.29E-01  |
| GOTERM_BP_FAT | GO:0031328~positive regulation of cellular biosynthetic process                                         | 16    | 1.79E-02 | 1.94            | 5.79E-01  |
| GOTERM_BP_FAT | GO:0009891~positive regulation of biosynthetic process                                                  | 16    | 1.93E-02 | 1.92            | 5.91E-01  |
| GOTERM_MF_FAT | GO:0008135~translation factor activity, nucleic acid binding                                            | 6     | 1.99E-02 | 3.84            | 5.32E-01  |
| GOTERM_BP_FAT | GO:0051969~regulation of transmission of nerve impulse                                                  | 6     | 2.17E-02 | 3.75            | 6.21E-01  |
| GOTERM_MF_FAT | GO:0016410~N-acyltransferase activity                                                                   | 5     | 2.18E-02 | 4.68            | 5.30E-01  |
| GOTERM_CC_FAT | GO:0000267~cell fraction                                                                                | 17    | 2.22E-02 | 1.84            | 4.45E-01  |
| GOTERM_CC_FAT | GO:0005829~cytosol                                                                                      | 16    | 2.30E-02 | 1.88            | 4.26E-01  |

| Category      | Term                                                       | Count | PValue   | Fold       |           |
|---------------|------------------------------------------------------------|-------|----------|------------|-----------|
|               |                                                            |       |          | Enrichment | Benjamini |
| GOTERM_BP_FAT | GO:0006334~nucleosome assembly                             | 5     | 2.33E-02 | 4.58       | 6.34E-01  |
| GOTERM_BP_FAT | GO:0006333~chromatin assembly or disassembly               | 6     | 2.33E-02 | 3.68       | 6.21E-01  |
| GOTERM_BP_FAT | GO:0007067~mitosis                                         | 8     | 2.35E-02 | 2.82       | 6.12E-01  |
| GOTERM_BP_FAT | GO:0000280~nuclear division                                | 8     | 2.35E-02 | 2.82       | 6.12E-01  |
| GOTERM_BP_FAT | GO:0051301~cell division                                   | 10    | 2.46E-02 | 2.38       | 6.17E-01  |
| GOTERM_CC_FAT | GO:0030658~transport vesicle membrane                      | 3     | 2.47E-02 | 12.09      | 4.20E-01  |
| GOTERM_BP_FAT | GO:0045941~positive regulation of transcription            | 14    | 2.53E-02 | 1.97       | 6.16E-01  |
| GOTERM_BP_FAT | GO:0031497~chromatin assembly                              | 5     | 2.54E-02 | 4.46       | 6.06E-01  |
| KEGG_PATHWAY  | mmu04110:Cell cycle                                        | 6     | 2.54E-02 | 3.54       | 9.33E-01  |
| GOTERM_BP_FAT | GO:0000279~M phase                                         | 10    | 2.59E-02 | 2.37       | 6.02E-01  |
| GOTERM_BP_FAT | GO:0000087~M phase of mitotic cell cycle                   | 8     | 2.60E-02 | 2.76       | 5.93E-01  |
| GOTERM_BP_FAT | GO:0034728~nucleosome organization                         | 5     | 2.65E-02 | 4.40       | 5.90E-01  |
| GOTERM_BP_FAT | GO:0065004~protein-DNA complex assembly                    | 5     | 2.65E-02 | 4.40       | 5.90E-01  |
| GOTERM_BP_FAT | GO:0031644~regulation of neurological system process       | 6     | 2.67E-02 | 3.55       | 5.82E-01  |
|               | GO:0010557~positive regulation of macromolecule            |       |          |            |           |
| GOTERM_BP_FAT | biosynthetic process                                       | 15    | 2.70E-02 | 1.89       | 5.77E-01  |
| GOTERM_BP_FAT | GO:0006974~response to DNA damage stimulus                 | 10    | 2.79E-02 | 2.33       | 5.79E-01  |
| GOTERM_BP_FAT | GO:0048285~organelle fission                               | 8     | 2.79E-02 | 2.72       | 5.71E-01  |
| GOTERM_CC_FAT | GO:0032993~protein-DNA complex                             | 5     | 2.86E-02 | 4.30       | 4.43E-01  |
| GOTERM_BP_FAT | GO:0000070~mitotic sister chromatid segregation            | 3     | 2.88E-02 | 11.16      | 5.73E-01  |
|               | GO:0046619~optic placode formation involved in camera-type |       |          |            |           |
| GOTERM_BP_FAT | eye                                                        | 2     | 2.95E-02 | 66.94      | 5.73E-01  |
| GOTERM_BP_FAT | GO:0001743~optic placode formation                         | 2     | 2.95E-02 | 66.94      | 5.73E-01  |
| GOTERM_CC_FAT | GO:0030054~cell junction                                   | 14    | 3.04E-02 | 1.92       | 4.39E-01  |
| GOTERM_BP_FAT | GO:0010628~positive regulation of gene expression          | 14    | 3.06E-02 | 1.92       | 5.78E-01  |
| GOTERM_MF_FAT | GO:0003913~DNA photolyase activity                         | 2     | 3.15E-02 | 62.68      | 6.35E-01  |
| GOTERM_BP_FAT | GO:0000819~sister chromatid segregation                    | 3     | 3.19E-02 | 10.57      | 5.85E-01  |
| GOTERM_CC_FAT | GO:0005794~Golgi apparatus                                 | 18    | 3.48E-02 | 1.70       | 4.62E-01  |
| GOTERM_BP_FAT | GO:0051726~regulation of cell cycle                        | 8     | 4.07E-02 | 2.50       | 6.68E-01  |
| GOTERM_BP_FAT | GO:0019585~glucuronate metabolic process                   | 2     | 4.39E-02 | 44.62      | 6.89E-01  |
| GOTERM_BP_FAT | GO:0006063~uronic acid metabolic process                   | 2     | 4.39E-02 | 44.62      | 6.89E-01  |
| GOTERM_CC_FAT | GO:0030659~cytoplasmic vesicle membrane                    | 5     | 4.55E-02 | 3.70       | 5.34E-01  |
| GOTERM_MF_FAT | GO:0003727~single-stranded RNA binding                     | 3     | 4.71E-02 | 8.55       | 7.54E-01  |
| GOTERM_CC_FAT | GO:0030662~coated vesicle membrane                         | 4     | 4.83E-02 | 4.86       | 5.34E-01  |

| Category      | Term                                                 | Count | PValue   | Fold       |           |
|---------------|------------------------------------------------------|-------|----------|------------|-----------|
|               |                                                      |       |          | Enrichment | Benjamini |
| GOTERM_MF_FAT | GO:0043167~ion binding                               | 75    | 4.84E-02 | 1.19       | 7.38E-01  |
| GOTERM_MF_FAT | GO:0019787~small conjugating protein ligase activity | 6     | 4.90E-02 | 3.01       | 7.18E-01  |
| GOTERM_MF_FAT | GO:0016881~acid-amino acid ligase activity           | 7     | 4.92E-02 | 2.64       | 6.96E-01  |

#### 5.4. DAVID terms in down-regulated 24-week DEGs

This is the complete list of significantly enriched annotation terms from DAVID in the 24-week down-regulated DEGs.

| Category      | Term                                                    | Count | PValue   | Fold       |           |
|---------------|---------------------------------------------------------|-------|----------|------------|-----------|
|               |                                                         |       |          | Enrichment | Benjamini |
| GOTERM_CC_FAT | GO:0005739~mitochondrion                                | 80    | 4.74E-15 | 2.52       | 1.31E-12  |
| GOTERM_CC_FAT | GO:0031974~membrane-enclosed lumen                      | 59    | 6.12E-08 | 2.09       | 8.38E-06  |
| GOTERM_CC_FAT | GO:0031980~mitochondrial lumen                          | 19    | 6.70E-08 | 4.86       | 6.12E-06  |
| GOTERM_CC_FAT | GO:0005759~mitochondrial matrix                         | 19    | 6.70E-08 | 4.86       | 6.12E-06  |
| GOTERM_CC_FAT | GO:0070013~intracellular organelle lumen                | 57    | 1.08E-07 | 2.10       | 7.39E-06  |
| GOTERM_CC_FAT | GO:0043233~organelle lumen                              | 57    | 1.18E-07 | 2.09       | 6.45E-06  |
| GOTERM_CC_FAT | GO:0005788~endoplasmic reticulum lumen                  | 11    | 7.60E-06 | 6.37       | 3.47E-04  |
| GOTERM_CC_FAT | GO:0044429~mitochondrial part                           | 31    | 8.49E-06 | 2.47       | 3.32E-04  |
| GOTERM_CC_FAT | GO:0005783~endoplasmic reticulum                        | 42    | 9.10E-06 | 2.09       | 3.12E-04  |
| GOTERM_BP_FAT | GO:0055114~oxidation reduction                          | 33    | 3.05E-05 | 2.23       | 4.41E-02  |
| GOTERM_CC_FAT | GO:0044432~endoplasmic reticulum part                   | 18    | 4.04E-05 | 3.25       | 1.23E-03  |
|               | GO:0016646~oxidoreductase activity, acting on the CH-NH |       |          |            |           |
| GOTERM_MF_FAT | group of donors, NAD or NADP as acceptor                | 5     | 2.61E-04 | 15.07      | 1.33E-01  |
| GOTERM_BP_FAT | GO:0016126~sterol biosynthetic process                  | 6     | 4.46E-04 | 9.09       | 2.80E-01  |
| KEGG_PATHWAY  | mmu00100:Steroid biosynthesis                           | 5     | 4.62E-04 | 12.98      | 6.01E-02  |
| KEGG_PATHWAY  | mmu00640:Propanoate metabolism                          | 6     | 4.82E-04 | 8.83       | 3.18E-02  |
| KEGG_PATHWAY  | mmu00280:Valine, leucine and isoleucine degradation     | 7     | 5.15E-04 | 6.72       | 2.27E-02  |
| GOTERM_BP_FAT | GO:0006695~cholesterol biosynthetic process             | 5     | 1.44E-03 | 9.88       | 5.09E-01  |
| GOTERM_BP_FAT | GO:0016125~sterol metabolic process                     | 8     | 1.47E-03 | 4.72       | 4.20E-01  |
|               | GO:0016645~oxidoreductase activity, acting on the CH-NH |       |          |            |           |
| GOTERM_MF_FAT | group of donors                                         | 5     | 2.03E-03 | 9.04       | 4.26E-01  |
| KEGG_PATHWAY  | mmu00620:Pyruvate metabolism                            | 6     | 2.08E-03 | 6.46       | 6.74E-02  |
| GOTERM_CC_FAT | GO:0005840~ribosome                                     | 13    | 2.25E-03 | 2.82       | 5.99E-02  |

| Category      | Term                                                                | Count | PValue   | Fold Enrichment | Benjamini |
|---------------|---------------------------------------------------------------------|-------|----------|-----------------|-----------|
| GOTERM_BP_FAT | GO:0009064~glutamine family amino acid metabolic process            | 6     | 2.39E-03 | 6.34            | 5.06E-01  |
| GOTERM_BP_FAT | GO:0008652~cellular amino acid biosynthetic process                 | 6     | 2.65E-03 | 6.20            | 4.79E-01  |
| GOTERM_CC_FAT | GO:0000313~organellar ribosome                                      | 6     | 2.80E-03 | 6.10            | 6.74E-02  |
| GOTERM_CC_FAT | GO:0005761~mitochondrial ribosome                                   | 6     | 2.80E-03 | 6.10            | 6.74E-02  |
| GOTERM_MF_FAT | GO:0008568~microtubule-severing ATPase activity                     | 3     | 2.82E-03 | 33.90           | 4.02E-01  |
| GOTERM_BP_FAT | GO:0006886~intracellular protein transport                          | 15    | 3.19E-03 | 2.47            | 4.91E-01  |
| GOTERM_CC_FAT | GO:0033279~ribosomal subunit                                        | 7     | 4.85E-03 | 4.42            | 1.05E-01  |
| GOTERM_BP_FAT | GO:0007033~vacuole organization                                     | 5     | 6.26E-03 | 6.68            | 6.86E-01  |
| GOTERM_MF_FAT | GO:0003735~structural constituent of ribosome                       | 10    | 6.29E-03 | 2.99            | 5.78E-01  |
| GOTERM_BP_FAT | GO:0034613~cellular protein localization                            | 15    | 6.42E-03 | 2.28            | 6.53E-01  |
| KEGG_PATHWAY  | mmu00330:Arginine and proline metabolism                            | 6     | 6.43E-03 | 5.00            | 1.59E-01  |
| GOTERM_BP_FAT | GO:0070727~cellular macromolecule localization                      | 15    | 6.73E-03 | 2.26            | 6.31E-01  |
| GOTERM_BP_FAT | GO:0006658~phosphatidylserine metabolic process                     | 3     | 6.78E-03 | 22.72           | 5.99E-01  |
| GOTERM_BP_FAT | GO:0006561~proline biosynthetic process                             | 3     | 6.78E-03 | 22.72           | 5.99E-01  |
| GOTERM_BP_FAT | GO:0006457~protein folding                                          | 9     | 6.88E-03 | 3.22            | 5.72E-01  |
| GOTERM_BP_FAT | GO:0008104~protein localization                                     | 28    | 8.24E-03 | 1.69            | 6.10E-01  |
| GOTERM_BP_FAT | GO:0015031~protein transport                                        | 25    | 9.05E-03 | 1.75            | 6.17E-01  |
| GOTERM_BP_FAT | GO:0045184~establishment of protein localization                    | 25    | 9.84E-03 | 1.73            | 6.22E-01  |
| GOTERM_BP_FAT | GO:0008610~lipid biosynthetic process                               | 14    | 1.05E-02 | 2.23            | 6.21E-01  |
| GOTERM_BP_FAT | GO:0006560~proline metabolic process                                | 3     | 1.23E-02 | 17.04           | 6.59E-01  |
| GOTERM_CC_FAT | GO:0030117~membrane coat                                            | 6     | 1.23E-02 | 4.31            | 2.30E-01  |
| GOTERM_CC_FAT | GO:0048475~coated membrane                                          | 6     | 1.23E-02 | 4.31            | 2.30E-01  |
| GOTERM_MF_FAT | GO:0004017~adenylate kinase activity                                | 3     | 1.24E-02 | 16.95           | 7.45E-01  |
| GOTERM_BP_FAT | GO:0016053~organic acid biosynthetic process                        | 9     | 1.25E-02 | 2.90            | 6.44E-01  |
| GOTERM_BP_FAT | GO:0046394~carboxylic acid biosynthetic process                     | 9     | 1.25E-02 | 2.90            | 6.44E-01  |
| GOTERM_BP_FAT | GO:0006091~generation of precursor metabolites and energy           | 13    | 1.27E-02 | 2.26            | 6.30E-01  |
| KEGG_PATHWAY  | mmu00310:Lysine degradation                                         | 5     | 1.30E-02 | 5.38            | 2.53E-01  |
| GOTERM_BP_FAT | GO:0046907~intracellular transport                                  | 18    | 1.45E-02 | 1.90            | 6.59E-01  |
| GOTERM_BP_FAT | GO:0044271~nitrogen compound biosynthetic process                   | 14    | 1.60E-02 | 2.11            | 6.79E-01  |
| KEGG_PATHWAY  | mmu04142:Lysosome                                                   | 8     | 1.72E-02 | 2.97            | 2.83E-01  |
| GOTERM_BP_FAT | GO:0008203~cholesterol metabolic process                            | 6     | 1.86E-02 | 3.90            | 7.17E-01  |
| GOTERM_BP_FAT | GO:0006694~steroid biosynthetic process                             | 6     | 1.97E-02 | 3.84            | 7.21E-01  |
| GOTERM_MF_FAT | GO:0016776~phosphotransferase activity, phosphate group as acceptor | 4     | 2.10E-02 | 6.70            | 8.55E-01  |

| Category      | Term                                                                                                       | Count | PValue   | Fold Enrichment | Benjamini |
|---------------|------------------------------------------------------------------------------------------------------------|-------|----------|-----------------|-----------|
| GOTERM_CC_FAT | GO:0016023~cytoplasmic membrane-bounded vesicle                                                            | 18    | 2.15E-02 | 1.81            | 3.46E-01  |
| GOTERM_BP_FAT | GO:0009309~amine biosynthetic process                                                                      | 6     | 2.19E-02 | 3.74            | 7.45E-01  |
| GOTERM_CC_FAT | GO:0005763~mitochondrial small ribosomal subunit                                                           | 3     | 2.26E-02 | 12.50           | 3.41E-01  |
| GOTERM_CC_FAT | GO:0000314~organellar small ribosomal subunit                                                              | 3     | 2.26E-02 | 12.50           | 3.41E-01  |
| GOTERM_MF_FAT | GO:0010861~thyroid hormone receptor activator activity                                                     | 3     | 2.34E-02 | 12.33           | 8.42E-01  |
| GOTERM_MF_FAT | GO:0030375~thyroid hormone receptor coactivator activity                                                   | 3     | 2.34E-02 | 12.33           | 8.42E-01  |
| GOTERM_CC_FAT | GO:0031988~membrane-bounded vesicle                                                                        | 18    | 2.42E-02 | 1.79            | 3.43E-01  |
| GOTERM_BP_FAT | GO:0006412~translation                                                                                     | 14    | 2.43E-02 | 1.99            | 7.66E-01  |
| GOTERM_BP_FAT | GO:0018130~heterocycle biosynthetic process                                                                | 5     | 2.53E-02 | 4.46            | 7.67E-01  |
| GOTERM_MF_FAT | GO:0016620~oxidoreductase activity, acting on the aldehyde or oxo group of donors, NAD or NADP as acceptor | 4     | 2.54E-02 | 6.23            | 8.27E-01  |
| GOTERM_MF_FAT | GO:0030546~receptor activator activity                                                                     | 3     | 2.76E-02 | 11.30           | 8.17E-01  |
| GOTERM_BP_FAT | GO:0006914~autophagy                                                                                       | 4     | 2.98E-02 | 5.86            | 8.09E-01  |
| GOTERM_CC_FAT | GO:0015935~small ribosomal subunit                                                                         | 4     | 3.13E-02 | 5.75            | 4.01E-01  |
| GOTERM_BP_FAT | GO:0009116~nucleoside metabolic process                                                                    | 5     | 3.42E-02 | 4.06            | 8.40E-01  |
| GOTERM_MF_FAT | GO:0019201~nucleotide kinase activity                                                                      | 3     | 3.70E-02 | 9.69            | 8.73E-01  |
| GOTERM_MF_FAT | GO:0031072~heat shock protein binding                                                                      | 5     | 4.09E-02 | 3.83            | 8.74E-01  |
| GOTERM_BP_FAT | GO:0009084~glutamine family amino acid biosynthetic process                                                | 3     | 4.17E-02 | 9.09            | 8.86E-01  |
| GOTERM_BP_FAT | GO:0006659~phosphatidylserine biosynthetic process                                                         | 2     | 4.34E-02 | 45.44           | 8.87E-01  |
| KEGG_PATHWAY  | mmu00903:Limonene and pinene degradation                                                                   | 3     | 4.35E-02 | 8.83            | 5.25E-01  |
| GOTERM_MF_FAT | GO:0047750~cholesterol delta-isomerase activity                                                            | 2     | 4.36E-02 | 45.20           | 8.69E-01  |
| GOTERM_BP_FAT | GO:0006730~one-carbon metabolic process                                                                    | 7     | 4.39E-02 | 2.72            | 8.82E-01  |
| GOTERM_BP_FAT | GO:0045444~fat cell differentiation                                                                        | 5     | 4.46E-02 | 3.72            | 8.79E-01  |
| GOTERM_BP_FAT | GO:0043193~positive regulation of gene-specific transcription                                              | 4     | 4.69E-02 | 4.91            | 8.84E-01  |
| KEGG_PATHWAY  | mmu00650:Butanoate metabolism                                                                              | 4     | 4.95E-02 | 4.77            | 5.31E-01  |

### 5.5. ConceptGen terms in up-regulated 24-week DEGs

This is the complete list of significantly enriched annotation terms from ConceptGen in the 24-week up-regulated DEGs.



| ConceptId | Concept Name                 | Concept Type Name | Gene List Size | Overlap | P-Value     | Q-Value     |
|-----------|------------------------------|-------------------|----------------|---------|-------------|-------------|
| 743177    | Mass Spectrometry            | MeSH              | 529            | 24      | 5.84763E-10 | 3.04895E-06 |
| 738083    | Animals                      | MeSH              | 472            | 20      | 6.33738E-08 | 0.000165216 |
| 739540    | Hela Cells                   | MeSH              | 621            | 22      | 2.39452E-07 | 0.000416167 |
| 738669    | Proteome                     | MeSH              | 931            | 26      | 1.25106E-06 | 0.001630755 |
| 742752    | Nuclear Proteins             | MeSH              | 558            | 19      | 3.37837E-06 | 0.003522969 |
| 743375    | Acetyltransferases           | MeSH              | 153            | 10      | 9.91976E-06 | 0.008364454 |
| 742310    | Protein Binding              | MeSH              | 494            | 17      | 1.12296E-05 | 8.36E-03    |
| 747193    | Two-Hybrid System Techniques | MeSH              | 387            | 14      | 5.12097E-05 | 0.033375948 |

#### 5.6. ConceptGen terms in down-regulated 24-week DEGs

This is the complete list of significantly enriched annotation terms from ConceptGen in the 24-week up-regulated DEGs.

| ConceptId | Concept Name              | Concept Type Name | Gene List Size | Overlap | P-Value     | Q-Value     |
|-----------|---------------------------|-------------------|----------------|---------|-------------|-------------|
| 743753    | Ribosomal Proteins        | MeSH              | 170            | 14      | 2.02535E-07 | 0.00105602  |
| 744804    | Endoplasmic Reticulum     | MeSH              | 141            | 12      | 1.42279E-06 | 0.003709217 |
| 746260    | HSP90 Heat-Shock Proteins | MeSH              | 37             | 7       | 4.79491E-06 | 0.008333546 |
| 743995    | Heat-Shock Proteins       | MeSH              | 84             | 9       | 8.72359E-06 | 0.011371202 |
| 739129    | Phenotype                 | MeSH              | 96             | 9       | 2.36435E-05 | 0.022175634 |
| 744513    | Molecular Chaperones      | MeSH              | 97             | 9       | 2.55186E-05 | 0.022175634 |
| 738668    | Proteins                  | MeSH              | 722            | 24      | 3.80472E-05 | 2.83E-02    |
